1 ***V. longisporum* elicits media-dependent secretome responses with a further**  
2 **capacity to distinguish between plant-related environments**

3

4 Miriam Leonard<sup>1</sup>, Anika Kühn<sup>1</sup>, Rebekka Harting<sup>1</sup>, Isabel Maurus<sup>1</sup>, Alexandra Nagel<sup>1</sup>,  
5 Jessica Starke<sup>1</sup>, Harald Kusch<sup>1</sup>, Oliver Valerius<sup>1</sup>, Kirstin Feussner<sup>2</sup>, Ivo Feussner<sup>2</sup>,  
6 Alexander Kaefer<sup>3</sup>, Manuel Landesfeind<sup>3</sup>, Burkhard Morgenstern<sup>3</sup>, Dörte Becher<sup>4</sup>,  
7 Michael Hecker<sup>4</sup>, Susanna A. Braus-Stromeier<sup>1</sup>, James W. Kronstad<sup>5</sup>, Gerhard H.  
8 Braus<sup>1\*</sup>

9

10 1) Department of Molecular Microbiology and Genetics, Institute of Microbiology and  
11 Genetics and Goettingen Center for Molecular Biosciences (GZMB), University of  
12 Goettingen, Goettingen, Germany.

13 2) Department for Plant Biochemistry, Albrecht-von-Haller-Institute for Plant Sciences  
14 and Goettingen Center for Molecular Biosciences (GZMB), University of  
15 Goettingen, Goettingen, Germany.

16 3) Department of Bioinformatics, Institute of Microbiology and Genetics and  
17 Goettingen Center for Molecular Biosciences (GZMB), University of Goettingen,  
18 Goettingen, Germany.

19 4) Department of Microbial Physiology, Institute for Microbiology, Ernst-Moritz-Arndt-  
20 Universität Greifswald, Greifswald, Germany.

21 5) Michael Smith Laboratories, Department of Microbiology and Immunology,  
22 University of British Columbia, Vancouver, Canada.

23 \*Corresponding author: Gerhard H. Braus (e-mail: [gbraus@gwdg.de](mailto:gbraus@gwdg.de))

## 24 **Abstract**

25 Verticillia cause a vascular wilt disease affecting a broad range of economically  
26 valuable crops. The fungus enters its host plants through the roots and colonizes the  
27 vascular system. It requires extracellular proteins for a successful plant colonization.  
28 The exoproteome of the allodiploid *Verticillium longisporum* was analyzed upon  
29 cultivation in different media. Secreted fungal proteins were identified by label free LC-  
30 MS/MS screening. *V. longisporum* induced two main secretion patterns. One response  
31 pattern was elicited in various non-plant related environments. The second pattern  
32 includes the exoprotein responses to the plant-related media, pectin-rich simulated  
33 xylem medium and pure xylem sap, which exhibited similar but additional distinct  
34 features. These exoproteomes include a shared core set of 223 secreted and similarly  
35 enriched fungal proteins. The pectin-rich medium significantly induced the secretion of  
36 144 proteins including a number of pectin degrading enzymes, whereas xylem sap  
37 triggered a smaller but unique fungal exoproteome pattern with 32 enriched proteins.  
38 The latter pattern included proteins with domains of known effectors,  
39 metallopeptidases and carbohydrate-active enzymes. The most abundant and  
40 uniquely enriched proteins of these different groups are the necrosis and ethylene  
41 inducing-like proteins Nlp2 and Nlp3, the cerato-platanin proteins Cp1 and Cp2, the  
42 metallopeptidases Mep1 and Mep2 and the CAZys Gla1, Amy1 and Cbd1. Deletion of  
43 the majority of the corresponding genes caused no phenotypic changes during *ex*  
44 *planta* growth or invasion and colonization of tomato plants. However, we discovered  
45 that the *NLP2* and *NLP3* deletion strains were compromised in plant infections. Overall,  
46 our exoproteome approach revealed that the fungus induces specific secretion  
47 responses in different environments. The fungus has a general response to non-plant  
48 related media whereas it is able to fine-tune its exoproteome in the presence of plant

49 material. Importantly, the xylem sap-specific exoproteome pinpointed Nlp2 and Nlp3  
50 as single effectors required for successful *V. dahliae* colonization.

51

## 52 **Author Summary**

53 *Verticillium* spp. infect hundreds of different plants world-wide leading to enormous  
54 economic losses. Verticillium wilt is a disease of the vasculature. The fungus colonizes  
55 the xylem of its host plant where it exploits the vascular system to colonize the whole  
56 plant. Therefore, the fungus spends part of its lifetime in this nutrient-low and  
57 imbalanced environment where it is inaccessible for disease control treatments. This  
58 lifestyle as well requires the fungus to react to plant defense responses by secreting  
59 specific effector molecules to establish a successful infection. We addressed the  
60 differences in media-dependent secretion responses of *Verticillium longisporum*. We  
61 identified a broad response pattern induced by several media, and a similar response  
62 (but with some distinct differences) for the plant-related environments: the pectin-rich  
63 medium SXM and xylem sap from the host rapeseed. Importantly, we show that the  
64 necrosis and ethylene inducing-like proteins Nlp2 and Nlp3 are xylem sap-specific  
65 proteins that are required for full *V. dahliae* pathogenicity on tomato. These factors  
66 play a role during the colonization phase and represent potential targets for new control  
67 strategies for Verticillium wilt.

68

## 69 **Introduction**

70 Vascular wilts caused by *Verticillium* spp. are widespread and destructive plant  
71 diseases, resulting in enormous economic losses. Haploid *Verticillium dahliae*, the  
72 economically most important representative of the genus, infects over 200 plant  
73 species worldwide [1, 2]. In contrast, the allodiploid *Verticillium longisporum* has a  
74 narrow host range that comprises primarily *Brassicaceae*. During the last several  
75 decades, increasing cultivation of the oilseed rape *Brassica napus* revealed  
76 *V. longisporum* as one of the most devastating pathogens of oilseed rape [3].  
77 *Verticillium* spp. enter the plant through the root, where the fungus then grows both  
78 inter- and intracellular in the root cortex towards the central cylinder and finally  
79 colonizes the xylem vessels [4, 5]. The transpiration stream plays an essential role in  
80 supplying water and mineral salts to the aerial tissue of plants [6]. The xylem sap is a  
81 nutrient-poor environment with plant defense proteins, hormones and low  
82 concentrations of amino acids and sugars [7, 8]. This makes it a very unique  
83 environment, which *Verticillium* spp. exploit for growth and systematic distribution in  
84 the host plant [7, 9]. Factors that contribute to adaptation to the unbalanced amino acid  
85 supply include the chorismate synthase encoding gene *VIARO2* and the cross-  
86 pathway transcription factor *CPC1* [7, 10]. The pathogen requires distinct sets of  
87 enzymes during different steps in plant colonization including carbohydrate active  
88 enzymes (CAZys) and peptidases, as well as small secreted proteins, to establish an  
89 infection and overcome the immune response of the plant. Several extracellular  
90 proteins including polygalacturonases, pectate lyases, xylanases or lipases  
91 presumably contribute to virulence during pathogen-host interactions [11–15].  
92 The plant immune response depends in part on transmembrane receptor proteins  
93 termed pattern recognition receptors (PRRs). Cell surface localized PRRs recognize  
94 conserved microbial molecules and structural motifs designated as pathogen-

95 associated molecular patterns (PAMPs); examples include the fungal cell-wall polymer  
96 chitin [16]. PAMP perception elicits a basal defense response which halts colonization  
97 by non-adapted pathogens and results in PAMP-triggered immunity (PTI). Host-  
98 adapted pathogens circumvent PTI by secretion of specific effector proteins as  
99 virulence factors for different phases of the infection cycle [17]. These secreted  
100 effectors may act passively or actively to combat plant defense responses [18].  
101 Well known examples of fungal effectors include the Avr4 and Ecp6 effectors from the  
102 leaf mold fungus *Cladosporium fulvum* that bind to chitin oligosaccharides via a  
103 carbohydrate-binding module (CBM) or LysM domain, respectively [18–21]. Similarly,  
104 a chitin scavenging function has also been assigned to Cp1 in *V. dahliae* strain XH-8.  
105 *CP1* knockout mutants were affected in cotton virulence [22]. This chitin protection  
106 leads to the suppression of the PTI of the plant and shields the fungal cell wall from  
107 plant chitinases that hydrolyze chitin [18–21]. Other fungal effectors such as  
108 metalloproteases possess enzymatic activity and are able to truncate plant chitinases  
109 that attack the fungal cell wall [23, 24]. Toxins provide another means for pathogens  
110 to attack plant hosts. For example, necrosis and ethylene inducing-like proteins (NLP)  
111 induce immune responses and cell death in host tissues and are conserved among  
112 fungi including *Verticillium* spp. [25, 26]. *V. dahliae* isolates encode up to eight NLP  
113 homologs [26, 27] whereas most other fungi generally only possess up to three NLPs  
114 [25]. Only Nlp1 and Nlp2 show cytotoxic activity in *Nicotiana benthamiana* leaves and  
115 play strain- and host-specific roles in *V. dahliae* virulence [26, 27]. Nlp1 and Nlp2 are  
116 required for *V. dahliae* JR2 pathogenicity on tomato and *A. thaliana* [26] whereas the  
117 corresponding proteins in *V. dahliae* V592 did not alter virulence on cotton [27]. Plant  
118 pathogens additionally require a set of carbohydrate-active enzymes (CAZys) that  
119 facilitate the breakdown of the plant cell wall [28]. The genomes of *Verticillium* species  
120 encode a greater number of cell wall-degrading enzymes with a strikingly high

121 repertoire of pectin-degrading enzymes compared to the secreted proteins of other  
122 plant pathogens [18, 29].

123 As the fungus lives in the vascular tissues during most of its life cycle in the plant,  
124 further knowledge about specific secretion responses would enable a better  
125 understanding of fungal-plant interactions during the infection process. Once the  
126 fungus resides inside the plant, it is inaccessible for pesticides and therefore the  
127 management of *Verticillium* wilt is very challenging. The most effective and widely used  
128 soil fumigants, methyl bromide or metam sodium, are used for high valuable crops, but  
129 are not profitable for all crops. Furthermore, these and other banned fungicides, are  
130 associated with environmental issues [1, 30]. Therefore, an indispensable approach  
131 for protection is to use resistant plant varieties, but these are not available in most  
132 crops. The selection pressure on fungal strains to quickly overcome genetic  
133 resistances of the plant makes it even more difficult to develop new resistant varieties  
134 [1, 18]. Consequently, an increased understanding of the infection process for  
135 *Verticillium* spp. is necessary to identify new approaches for disease control.

136 Until now, it is not known how the effector repertoire of *Verticillium* spp. is expressed  
137 once the pathogen enters the plant. Analysis of *Verticillium* strains in their vascular  
138 environment is technically demanding, and a large number of plants are required to  
139 harvest sufficient amounts of xylem sap. Proteomic approaches can be fruitful because  
140 comparison of the intracellular fungal proteome in diluted xylem sap and pectin-rich  
141 medium resulted in the identification of a disease-related catalase peroxidase, which  
142 was only up-regulated in the presence of xylem sap and not in the presence of pectin  
143 [31].

144 In this study, we extended the comparative analysis with rapeseed xylem sap and  
145 focused on the fungal secretome. *V. longisporum* secreted proteins that were derived  
146 from cultivation in different growth media were identified by a proteomic approach and

147 the protein patterns induced by different environments were compared. Our goal was  
148 to obtain a more comprehensive overview of the secreted factors of *V. longisporum* in  
149 response to different substances in its environment that putatively reflect different  
150 stages of the infection. We analyzed the exoproteomes of *V. longisporum* on a broad  
151 range of media from water to minimal and complete media. As an additional condition,  
152 we applied simulated xylem medium (SXM), which is rich in pectin and which was  
153 originally developed to mimic the natural plant growth environment, the xylem sap [32].  
154 All exoproteomes were compared to fungal cultures grown in extracted xylem sap of  
155 the *V. longisporum* host oilseed rape *B. napus*.

156 Our results demonstrate that *V. longisporum* is able to distinguish between the different  
157 environments to express different secretome patterns. The pectin-rich medium and  
158 xylem sap each triggered distinct protein patterns in comparison to all other tested  
159 media. The fungal response to growth in the pectin-rich medium and xylem sap  
160 consists of a shared core exoproteome and an additional group of uniquely secreted  
161 proteins. A small number of proteins are specifically expressed in xylem sap including  
162 CAZys and other potential virulence factors. Of the factors that were specifically  
163 enriched in xylem sap, the NLPs, Nlp2 and Nlp3 proteins, we demonstrate  
164 contributions to plant pathogenicity as virulence factors.

## 165 **Results**

### 166 **Xylem sap and pectin-rich SXM trigger specific exoproteomic patterns compared** 167 **to other growth media**

168 *V. longisporum* is a rapeseed pathogenic fungus that is able to grow on a variety of  
169 different substrates and colonizes the xylem vessels of plants. This requires the  
170 adaptation of the fungus to changing nutrient conditions and other biotic and abiotic  
171 factors. We examined how different growth media affected the exoproteome of  
172 *V. longisporum* with a specific focus on identification of distinct patterns triggered by  
173 different plant-related contents. For all experiments, *V. longisporum* was precultured  
174 in liquid potato dextrose medium (PDM) to ensure an equal initial growth state prior to  
175 the media-specific induction of secretion. The proteins of the *V. longisporum* culture  
176 supernatants from different media were precipitated and separated by one-  
177 dimensional SDS-PAGE thereby resulting in several different patterns in colloidal  
178 Coomassie stained gels (Fig 1A). The defined media conditions corresponded to  
179 different levels of complexity including nutrient-free water, water with glucose as  
180 carbon source, and a more complex nitrogen-rich medium (YNB: Yeast Nitrogen  
181 Base). Several plant-related media were included because the natural habitat of the  
182 pathogen *V. longisporum* is inside host plants. These media included the nutrient-  
183 limited sucrose medium CDM (Czapek-Dox medium), which was either supplemented  
184 with 7% of *B. napus* xylem sap or plant proteins, vegetable juice (V8 juice) and the  
185 pectin-rich SXM, which was developed to mimic fungal growth conditions in plants *in*  
186 *vitro* [32, 33]. Finally, we also used extracted xylem sap from the rapeseed plant  
187 *B. napus*, corresponding to the natural habitat of the fungus.

188 To obtain a more comprehensive analysis, complete lanes of the gels with the  
189 respective exoproteomes were fractionally subjected to tryptic protein digestion and  
190 the resulting peptides were analyzed by LC MS/MS. The obtained raw data were



191 channeled through a bioinformatics pipeline based on Proteome  
192 Discoverer Software 1.3™ (Thermo Scientific) and an in-house genome-wide protein  
193 sequence database of *V. longisporum*. The received spectral counts were compared  
194 on single secreted protein level by color-coded one-dimensional self-organizing maps  
195 (Fig 1B). These revealed that proteins that were strongly enriched in xylem sap or SXM  
196 were not enriched in any other condition. Differences in the exoproteome signatures  
197 are also illustrated by sample clustering in a principle component analysis plot (Fig  
198 1C). Exoproteomes of *V. longisporum* derived from very diverse media including  
199 nutrient-free water, V8 juice, CDM or YNB medium show a similar pattern.  
200 Supplementation of CDM with *B. napus* plant proteins or xylem sap with a final  
201 concentration of 7% did not result in a different exoproteome pattern, neither did  
202 glucose supplementation to water. Therefore, the respective results for these  
203 conditions were combined together. In contrast, proteins secreted in pectin-rich SXM  
204 or xylem sap each showed a distinct pattern in comparison to the other media  
205 conditions. These patterns representing the latter exoproteomes are similar in some  
206 features as the clusters lie close to each other on the x-axis, although some differences  
207 are present as analyzed further below.

208 Overall, our analysis illustrates that the fungus has the potential to form a general  
209 secretome response to non-plant related environments and, in addition, a similar, but  
210 more specialized response to plant-related substances (Fig 1C).

211  
212 **Pectin-rich medium and xylem sap elicit distinct *V. longisporum* exoproteome**  
213 **responses**

214 Similarities and differences of the specific *V. longisporum* exoproteome responses in  
215 the pectin-rich SXM compared to xylem sap were analyzed in more detail in a large-  
216 scale experimental set up. The protein patterns of six biological replicates of each

217 cultivation condition were compared. The proteins were precipitated from the culture  
218 supernatants, subjected to LC MS/MS and analyzed. The data set was filtered with a  
219 statistical workflow using MarVis-Suite [34]. S1 Table shows the identities of the 445  
220 proteins from an in-house database with their protein sequences and details on their  
221 abundance as measured by identified peptides. The list is sorted according to the most  
222 specifically enriched proteins in xylem sap (green) and SXM (red), respectively.  
223 Proteins that are not considered as specifically enriched are listed at the bottom of the  
224 table and belong to the core exoproteome.

225 Clustering analysis of spectral count data of the 445 proteins with MarVis-Suite was  
226 visualized as a one-dimensional self-organizing map (Fig 2A). Upper and lower rows  
227 represent the two growth conditions, SXM and xylem sap, and each column  
228 corresponds to one identified protein. The spectral counts were normalized and color-  
229 coded according to the indicated scale where red columns indicate increased and dark  
230 blue columns no spectral counts. A set of proteins, which have a stable abundance in  
231 both conditions is considered as the shared core exoproteome. Proteins that showed  
232 different peptide counts in the two growth conditions were considered as differentially  
233 enriched (Fig 2A, 'enriched in Xylem sap' and 'enriched in SXM', respectively).

234 *V. longisporum* is an allodiploid organism derived from two parental strains, and  
235 *V. longisporum* 43 used in this study is a result of an A1xD1 hybridization event. A1  
236 and D1 are described as so far unknown haploid *Verticillium* species, of which D1 is  
237 closely related to *V. dahliae* and A1 is distantly related to *V. alfalfae* [2]. Most genes  
238 are encoded in two copies, reflecting the two isogenes of both parental lineages.  
239 BLAST searches against the *V. dahliae* JR2 and the *V. alfalfae* VaMs.102 proteomes  
240 from Ensembl Fungi [35] were conducted. As a consequence, two isogene products  
241 were detected for most identified proteins.

242 The list of proteins was further and thoroughly analyzed manually to functionally  
243 classify the candidates. As the Ensembl Fungi annotations are more robust, further  
244 analyses are based on the *V. dahliae* JR2 protein sequences except for candidates  
245 with no corresponding hit in *V. dahliae*. Here, the protein sequences for further  
246 analyses were retrieved from the *V. alfalfae* VaMs.102 proteome [35]. Putative  
247 functions of robust annotated proteins were addressed with InterProScan [36], the  
248 CAZy database (<http://www.cazy.org>) and dbCAN2 [37]. All details are given in S2  
249 Table. The Venn diagram in Fig 2B displays the 399 candidates with robust  
250 annotations in different groups. Protein extracts from pectin-rich SXM and xylem sap  
251 share a core exoproteome of 223 proteins with a similar abundance in both media, but  
252 each also induced the secretion of distinct exoprotein patterns. SXM cultivation  
253 resulted with 144 secreted proteins in a four-fold higher number of secreted proteins  
254 specifically enriched in comparison to xylem sap, where the peptide count of 32  
255 proteins was specifically increased (Fig 2B).

256 These results show that SXM, which is used to simulate xylem sap *in vitro*, and xylem  
257 sap of *B. napus* induce distinct secretion responses with different facets. This indicates  
258 that the fungus is able to fine-tune its secretion responses.

259

### 260 ***V. longisporum* secretes a broad arsenal of substrate-degrading enzymes in** 261 **pectin-rich medium and in xylem sap**

262 All 399 identified secreted proteins were classified into functional groups according to  
263 the predicted domains (S2 Table, Fig 2C). For 65 identified proteins, classified as  
264 hypothetical gene products, no information about structural domains or putative  
265 functions could be found ('Unknown'). 'Proteins involved in lipid metabolism', 'Effectors'  
266 and smaller groups combined as 'Others' represent minor groups. More proteins were  
267 sorted to 'Proteins involved in redox processes' (9%) or 'Peptidases' (16%) whereas

268 the functional classification revealed an overrepresentation of proteins involved in  
269 carbohydrate metabolism or catabolism with around 40% of proteins acting on  
270 carbohydrates and another 5% of proteins with domains interacting with carbohydrates  
271 (Fig 2C, S3 Table).

272 Further analysis of proteins from functional groups regarding the induction by different  
273 media showed that pectin-rich medium predominantly triggered the secretion of  
274 carbohydrate-degrading enzymes, but also peptidases and redox enzymes (Fig 2D,  
275 S3 Table). No effectors were found in the SXM-specific exoproteome. Cultivation in  
276 xylem sap triggered the unique secretion of carbohydrate-degrading enzymes,  
277 effectors, peptidases and redox enzymes though the total number of enriched proteins  
278 is significantly smaller compared to the SXM-specific secreted proteins.

279 The majority of identified secreted proteins comprise the carbohydrate-active  
280 enzymes, which contain protein motifs that have been classified into sequence-related  
281 families of CAZy modules [38]. Within the group of all secreted proteins we identified  
282 96 glycoside hydrolases (GHs), 36 polysaccharide lyases (PLs), 21 carbohydrate  
283 esterases (CEs), one glycosyltransferase (GT), 19 auxiliary activities (AAs). Of these  
284 CAZys, 21 proteins additionally possess non-catalytic, carbohydrate-binding modules  
285 (CBMs) (Fig 2E, S4 Table). In the proteins from the pectin-rich medium condition, the  
286 CAZys are highly represented with 64 proteins whereas in xylem sap only 19 CAZys  
287 are specifically enriched and 90 proteins belong to the core exoproteome (S4 Table).  
288 The core exoproteome exhibits an overrepresentation of CAZy families with 32  
289 proteins acting on pectin, including members of family GH28 (five proteins), PL1 (16  
290 proteins), PL3 (seven proteins) and CE8 (four proteins). Additionally, the SXM-specific  
291 and most enriched CAZy families comprise 20 pectin-degrading enzymes (families  
292 GH28, PL1 and CE12 with ten, six and four proteins, respectively, S4 Table). Only a

293 few CAZys were specifically enriched in the xylem sap condition, and these were  
294 distributed in different families.

295 Overall, we found that *B. napus* xylem sap and pectin-rich SXM, employed as plant-  
296 related culture environments, predominantly induced the secretion of carbohydrate-  
297 degrading enzymes. Compared to the rapeseed xylem sap condition, SXM triggered  
298 an additional set of CAZys that were specifically enriched after cultivation in this  
299 medium.

300

### 301 **Xylem sap triggers the secretion of potential and known *Verticillium* effectors**

302 Compared to the pectin-rich SXM, *V. longisporum* formed a more specific secretion  
303 response in xylem sap with only 32 proteins that are uniquely enriched. This indicates  
304 that the fungus can distinguish between xylem sap and the presence of other plant  
305 material and accordingly fine-tunes its protein secretion. Furthermore, the proteins  
306 secreted in the host xylem sap might be specifically important during plant colonization.  
307 Table 1 displays the xylem sap-specific proteins. The corresponding isogenes are  
308 paired up and the best hit in *V. dahliae* JR2 is given, except for the *V. alfalfae* specific  
309 proteins that were searched against the *V. alfalfae* VaMs.102 proteome (Ensembl  
310 Fungi). Within the identified groups, proteins were ranked according to the quotient of  
311 peptide counts identified in xylem sap (XyS) by the number detected in the pectin-rich  
312 SXM. Displayed peptide counts were averaged from 6 biological replicates. If the  
313 number was below 1, it was calculated as 0 and the quotient was given as the average  
314 XyS peptide counts (>). The 32 xylem sap-specific proteins comprise 15 'Proteins  
315 acting on carbohydrates', five 'Proteins with domains interacting with carbohydrates',  
316 five 'Effectors', four 'Peptidases', two 'Proteins involved in redox processes' and one  
317 with a ubiquitin binding domain that was grouped as 'Other' (Table 1).

318 Several potential virulence factors were identified in the xylem sap-specific response  
319 set. Proteins involved in the degradation of carbohydrates are known to contribute to  
320 *V. dahliae* pathogenicity [39, 40]. The five proteins comprising domains of already  
321 characterized *V. dahliae* effectors incorporate either necrosis-inducing protein (NPP1,  
322 also necrosis-inducing *Phytophthora* protein) or cerato-platanin (CP) domains. NPP1  
323 domains are characteristic for necrosis and ethylene inducing-like proteins (NLP) of  
324 which *Verticillium* spp. contain up to eight members [26]. Nlp1 and Nlp2 were  
325 previously shown to differentially contribute to *V. dahliae* pathogenicity on different  
326 hosts [26, 27, 41]. Our secretome approach identified four isogene products  
327 corresponding to two NLPs, Nlp2 and Nlp3. Of the CP domain-containing proteins, one  
328 isogene assigned to Cp2 was identified as specifically enriched in xylem sap.  
329 *V. dahliae* possesses two CP proteins of which Cp1 affects virulence on cotton [22].  
330 Additionally, four isogenes of two metallopeptidases were found in the xylem sap-  
331 specific secretome. Metalloproteases are able to truncate host defense proteins such  
332 as chitinases and therefore have the potential to act as virulence factors [23].  
333 These findings show that *V. longisporum* finetunes its protein secretion response in  
334 the host xylem sap, which include known and potential effectors important for plant  
335 colonization or infection.

336 **Table 1. Xylem sap-specific exoproteins of *V. longisporum*.**

|                                                      | Name                | VI43 identifier      | Best Hit <i>V. dahliae</i> JR2                                | Protein domain                                                | Peptide counts |                | XyS/<br>SXM    | s/l<br>ratio |
|------------------------------------------------------|---------------------|----------------------|---------------------------------------------------------------|---------------------------------------------------------------|----------------|----------------|----------------|--------------|
|                                                      |                     |                      |                                                               |                                                               | SXM            | XyS            |                |              |
| Proteins acting on carbohydrates                     | <b>Gla1</b>         | vl43-au16.g17458.t1  | VDAG_JR2_Chr8g11020a                                          | Glycoside hydrolase 15, Carbohydrate binding module family 20 | 0              | 8.2            | <b>&gt;8.2</b> | 0.76         |
|                                                      |                     | vl43-au16.g13024.t1  |                                                               |                                                               | 0              | 3.8            | <b>&gt;3.8</b> | 0.62         |
|                                                      | <b>Amy1</b>         | vl43-au16.g6892.t1   | VDAG_JR2_Chr7g03330a                                          | Glycoside hydrolase 13                                        | 1.5            | 12             | <b>8</b>       | 0.68         |
|                                                      |                     | vl43-au16.g9360.t1   | <i>V. alfalfae</i> : VDBG_05827                               | Glycosyl hydrolases 134                                       | 0              | 7.5            | <b>&gt;7.5</b> | 0.77         |
|                                                      |                     | vl43-au16.g6746.t1   | VDAG_JR2_Chr3g11080a                                          | Glycoside hydrolase 43                                        | 1.2            | 7.8            | <b>6.5</b>     | 0.68         |
|                                                      |                     | vl43-au16.g12522.t1  |                                                               |                                                               | 1              | 5.8            | <b>5.8</b>     | 0.61         |
|                                                      |                     | vl43-au16.g12596.t1  | VDAG_JR2_Chr6g04040a                                          | Glycosyl hydrolases 11                                        | 0.8            | 5.2            | <b>&gt;5.2</b> | 0.55         |
|                                                      |                     | vl43-au16.g15027.t1  | VDAG_JR2_Chr6g09340a                                          | Polysaccharide lyase 6                                        | 2.2            | 11.2           | <b>5.1</b>     | 0.57         |
|                                                      |                     | vl43-au16.g5309.t1   |                                                               |                                                               | 2.3            | 10.8           | <b>4.7</b>     | 0.59         |
|                                                      |                     | vl43-au16.g207.t1    | VDAG_JR2_Chr1g06940a                                          | Glycoside hydrolase 16                                        | 2.2            | 9              | <b>4.1</b>     | 0.56         |
|                                                      |                     | vl43-au16.g14986.t1  |                                                               |                                                               | 2.3            | 9.5            | <b>4.1</b>     | 0.55         |
|                                                      |                     | vl43-au16.g15947.t1  | VDAG_JR2_Chr3g00250a                                          | Glycoside hydrolase 131                                       | 1              | 4              | <b>4</b>       | 0.43         |
|                                                      |                     | vl43-au16.g9097.t1   | <i>V. alfalfae</i> : VDBG_03110                               | Glycoside hydrolase 12                                        | 1              | 2.8            | <b>2.8</b>     | 0.38         |
|                                                      |                     | vl43-au16.g16765.t1  | VDAG_JR2_Chr1g04240a                                          | Glycosyl transferase 1                                        | 0.3            | 1.7            | <b>&gt;1.7</b> | 0.49         |
|                                                      | vl43-au16.g9025.t1  | VDAG_JR2_Chr7g01210a | Carbohydrate esterase 1, Carbohydrate binding module family 1 | 0.2                                                           | 1.3            | <b>&gt;1.3</b> | 0.49           |              |
| Proteins with domains interacting with carbohydrates | <b>Cbd1</b>         | vl43-au16.g11636.t1  | VDAG_JR2_Chr4g04440a                                          | Auxiliary activity 13, Carbohydrate binding module family 20  | 1.7            | 13.8           | <b>8.1</b>     | 0.71         |
|                                                      |                     | vl43-au16.g3945.t1   |                                                               |                                                               | 1.3            | 6.8            | <b>5.2</b>     | 0.55         |
|                                                      |                     | vl43-au16.g5519.t1   | VDAG_JR2_Chr6g09790a                                          | Auxiliary activity 9                                          | 2              | 8.2            | <b>4.1</b>     | 0.51         |
|                                                      | vl43-au16.g20506.t1 | 2.3                  |                                                               |                                                               | 8.8            | <b>3.8</b>     | 0.46           |              |
|                                                      |                     | vl43-au16.g11273.t1  | VDAG_JR2_Chr6g05220a                                          | WSC Carbohydrate binding domain                               | 3.2            | 11.7           | <b>3.7</b>     | 0.46         |
| Effectors                                            | <b>Nlp3</b>         | vl43-au16.g9727.t1   | VDAG_JR2_Chr4g05950a                                          | Necrosis inducing protein                                     | 0.3            | 8.3            | <b>&gt;8.3</b> | 0.84         |
|                                                      |                     | vl43-au16.g96.t1     |                                                               |                                                               | 0.2            | 6.3            | <b>&gt;6.3</b> | 0.81         |
|                                                      | <b>Nlp2</b>         | vl43-au16.g3884.t1   | VDAG_JR2_Chr2g05460a                                          | Necrosis inducing protein                                     | 1              | 4.8            | <b>4.8</b>     | 0.61         |
|                                                      |                     | vl43-au16.g12566.t1  |                                                               |                                                               | 1.8            | 6.5            | <b>3.6</b>     | 0.47         |
|                                                      | <b>Cp2</b>          | vl43-au16.g16459.t1  | VDAG_JR2_Chr2g07000a                                          | Cerato-platanin                                               | 0.3            | 1.8            | <b>&gt;1.8</b> | 0.41         |
| Peptidases                                           | <b>Mep2</b>         | vl43-au16.g19470.t1  | VDAG_JR2_Chr1g21900a                                          | Peptidase M43                                                 | 1              | 8.8            | <b>8.8</b>     | 0.57         |
|                                                      |                     | vl43-au16.g11262.t1  |                                                               |                                                               | 1.3            | 8.7            | <b>6.7</b>     | 0.55         |
|                                                      | <b>Mep1</b>         | vl43-au16.g19320.t1  | VDAG_JR2_Chr8g09760a                                          | FTP domain, Peptidase M36, fungalysin                         | 1.7            | 14             | <b>8.2</b>     | 0.69         |
|                                                      |                     | vl43-au16.g14388.t1  |                                                               |                                                               | 1.8            | 13.5           | <b>7.5</b>     | 0.65         |
| Proteins involved in redox processes                 |                     | vl43-au16.g2684.t1   | VDAG_JR2_Chr8g10630a                                          | FAD-binding domain                                            | 6              | 13.2           | <b>2.2</b>     | 0.33         |
|                                                      |                     | vl43-au16.g13340.t1  |                                                               |                                                               | 8              | 15.3           | <b>1.9</b>     | 0.34         |
| Other                                                |                     | vl43-au16.g18734.t1  | VDAG_JR2_Chr1g04640a                                          | Ubiquitin 3 binding protein But2, C-terminal                  | 9.7            | 18.8           | <b>1.9</b>     | 0.37         |

337 VI43 = *V. longisporum* 43; SXM = simulated xylem medium; XyS = xylem sap;  
 338 s/l = signal-to-level; FTP = fungalysin/thermolysin propeptide; WSC = putative  
 339 carbohydrate-binding domain  
 340

341 **Xylem sap-specific secreted proteins are dispensable for *V. dahliae* ex planta**  
342 **development**

343 *V. longisporum* formed a specific secretion response in xylem sap compared to other  
344 media showing that the fungus can distinguish between xylem sap and the presence  
345 or absence of other plant material. To investigate whether the xylem sap-specific  
346 proteins play a major role in fungal colonization of the plant, the top candidates of the  
347 protein groups that have been shown to play critical roles in plant colonization [5, 22,  
348 26] were analyzed in this study.

349 Chosen proteins are highlighted in Table 1 with a bold given name. The follow up  
350 genetic analyses of these proteins were conducted with *V. dahliae* JR2 because it can  
351 be more easily manipulated genetically compared with the allodiploid *V. longisporum*  
352 strain. All candidates from the group “Effectors” were included in the follow up  
353 experiments. These comprise two NLPs, Nlp2 and Nlp3, and the Cp2 protein. The  
354 *V. dahliae* JR2 homolog of *CP1* was tested as well. Cp1 is a virulence factor of  
355 *V. dahliae* strain XH-8 in infections on cotton [22]. The peptidases that were identified  
356 as specifically enriched in xylem sap were named Mep1 and Mep2 and were both  
357 included in our genetic analyses. Of the largest group, proteins involved in  
358 carbohydrate degradation, the three most highly abundant candidates, the  
359 glucoamylase Gla1, the carbohydrate-binding module containing protein Cbd1, and  
360 the  $\alpha$ -amylase Amy1, were further investigated.

361 For the construction of the corresponding deletion mutants, the open reading frame  
362 (ORF) was replaced with either the nourseothricin or hygromycin resistance cassette  
363 under control of the constitutively active *gpdA* promoter and *trpC* terminator. Correct  
364 integration of the deletion cassette was verified by Southern hybridization (S1-S4 Figs).  
365 To investigate a putative combined effect of proteins in similar groups, the following  
366 double deletion strains were constructed as well: *NLP2/NLP3*, *MEP1/MEP2* and



367 *CP1/CP2*. Ectopic complementation strains were also constructed for the *CP1* and  
368 *CP2* deletion mutants. Phenotypical analysis of all strains revealed no alteration  
369 compared to *V. dahliae* JR2 wildtype (WT) growth and development on solid agar  
370 plates such as minimal and complete medium, and simulated xylem medium.  
371 Additionally, the strains were tested for the involvement in stress responses with at  
372 least one stressor tested for each strain. The stress inducing agent was added to  
373 minimal medium. The cell wall perturbing agents SDS and ethanol or the oxidative  
374 stressor hydrogen peroxide were used. All single deletion, double deletion and  
375 complementation strains exhibited a similar morphological development to *V. dahliae*  
376 WT, which is exemplified by growth on SXM (Fig 3).

377 Overall, these results suggest that *Cp1*, *Cp2*, *Nlp2*, *Nlp3*, *Mep1*, *Mep2*, *Gla1*, *Cbd1*  
378 and *Amy1*, that were found to be enriched specifically in xylem sap cultures, are  
379 dispensable for vegetative growth, development and stress response of *V. dahliae*.

380

### 381 **Xylem sap-specific CAZys, metalloproteases and cerato-platanin proteins are** 382 **dispensable for *V. dahliae* JR2 pathogenicity in tomato infections**

383 The functions of the proteins that were specifically enriched after cultivation in xylem  
384 sap would be predicted to be important in the interaction with plant substrates in the  
385 host xylem sap. Therefore, all *V. dahliae* single and double deletion strains were tested  
386 for their virulence on tomato. Ten-day-old tomato seedlings were root-inoculated with  
387 the indicated mutant strains, and plants treated with demineralized water were used  
388 as mock controls. Disease symptoms were measured three weeks after inoculation  
389 and included the height of the plant, the longest leaf length and the fresh weight of the  
390 aerial part of the plant. The stack diagrams display the percentage of plants exhibiting  
391 the respective symptoms (Figs 4, 5). We found that plants infected with *GLA1*, *CBD1*,  
392 *AMY1*, *MEP1*, *MEP2*, *MEP1/MEP2*, *CP1*, *CP2*, *CP1/CP2* deletion strains or *CP1* or

393 *CP2* complementation strains showed similar disease symptoms as the WT-infected  
394 plants. That is, all fungal infections resulted in a similar stunting phenotype as WT  
395 colonization, and plant defense reactions were observed by the discoloration of the  
396 hypocotyls in all infected plants.

397 These experiments demonstrated that the tested CAZys or two genes encoding  
398 metalloproteases or cerato-platanin proteins do not affect *V. dahliae* pathogenicity  
399 under the tested conditions.

400

### 401 **Nlp3-GFP is secreted into the extracellular space**

402 As described above, two necrosis and ethylene inducing-like proteins were detected  
403 in the xylem sap-specific exoproteome. Members of this group are known to contribute  
404 to *V. dahliae* pathogenicity and to exhibit host-specific roles [26, 27, 41]. Nlp1 and Nlp2  
405 contribute to *V. dahliae* JR2 virulence on tomato and *Arabidopsis* [26], whereas  
406 corresponding proteins in *V. dahliae* V592 did not alter virulence on cotton [27].  
407 Additionally, Nlp3 did not show any cytotoxic activity on *N. benthamiana* and has not  
408 been further characterized [26]. Because our exoproteome approach identified Nlp2  
409 and Nlp3 as specifically secreted in xylem sap, we subsequently carried out additional  
410 analyses of the roles of these proteins.

411 To monitor the secretion of Nlp3 in liquid media, the gene was fused with a C-terminal  
412 *GFP* tag to *NLP3* under the control of the constitutive strong *gpdA* promoter. *V. dahliae*  
413 JR2 and *NLP3* deletion strains ectopically overexpressing *NLP3-GFP* were confirmed  
414 by Southern hybridization (S1 Fig). Growth characteristics of the strains expressing  
415 *NLP3-GFP* were analyzed as described for the other deletion strains. Similar to the  
416 deletion strains, the *NLP3-GFP* overexpressing mutants did not show any significant  
417 growth variation in comparison to the WT strain under the tested conditions as shown  
418 on CDM plates (S5 Fig). Confocal microscopy of the *NLP3-GFP* strains confirmed the

419 production of a GFP signal derived by the Nlp3-GFP fusion protein with an intracellular  
420 location at vacuoles (Fig 6A). The expression and secretion of the fusion protein was  
421 analyzed by western experiments using a 24 h-old SXM culture. Intracellular proteins  
422 were extracted from fungal mycelium, extracellular proteins were precipitated from the  
423 culture supernatant and subjected to SDS-PAGE. Western analysis of the *NLP3-GFP*  
424 strain confirmed the overexpression and secretion of the fusion protein in pectin-rich  
425 medium (Fig 6B). WT and *NLP3* deletion strains ectopically overexpressing *NLP3-GFP*  
426 (WT/OE-*NLP3-GFP* and  $\Delta$ *NLP3*/OE-*NLP3-GFP*, respectively) revealed strong signals  
427 for Nlp3-GFP with a size of 52 kDa in extracellular extracts after probing with  $\alpha$ -GFP  
428 antibody whereas intracellular protein extracts result in faint bands at the size of the  
429 fusion protein as well as for free GFP (~27 kDa). For the control strain *V. dahliae* JR2  
430 expressing free GFP (WT/OE-*GFP*) no signal was detected in extracellular space and  
431 a strong GFP signal was detected in intracellular extracts. These data corroborate that  
432 Nlp3 is primarily a secreted protein and its expression levels neither influence growth  
433 nor development.

434

435 **Necrosis and ethylene inducing-like proteins Nlp2 and Nlp3 contribute to**  
436 ***V. dahliae* virulence on tomato**

437 Nlp2 only exhibited minor effects in the *V. dahliae*-tomato system [26] whereas Nlp3  
438 has not been tested for *V. dahliae* pathogenicity. We first analyzed the adherence to  
439 the root and further root colonization of the *NLP3* deletion strain on *A. thaliana* with  
440 fluorescence microscopy. The *NLP3* deletion strain expressing free *GFP* under the  
441 control of the *gpdA* promoter ( $\Delta$ *NLP3*/OE-*GFP*) and the WT control overexpressing  
442 *GFP* (WT/OE-*GFP*) were used for root inoculation of three-week-old *Arabidopsis*  
443 seedlings. The root colonization at three and five days post inoculation was  
444 indistinguishable between WT/OE-*GFP* and  $\Delta$ *NLP3*/OE-*GFP* (Fig 7A). Initial root

445 colonization was observed at three days following inoculation and whole roots were  
446 covered with fungal hyphae after five days suggesting that Nlp3 is dispensable for  
447 *A. thaliana* root colonization.

448 Furthermore, the effect on pathogenicity towards tomato was investigated. Tomato  
449 infections were carried out as described above. All tested deletion strains were  
450 compromised in virulence compared to WT, but the plants nevertheless developed  
451 disease symptoms (Fig 7B). All infected plants exhibited stem discolorations and  
452 fungal outgrowth was detected from surface sterilized stems (Fig 7C, bottom row).  
453 Symptom development in plants colonized with deletion strains was less severe  
454 compared to WT infection. An overview of the trays with 15 treated plants, which is a  
455 representative number of plants considering fluctuations in the infection success,  
456 nicely demonstrate the differences between different strains (Fig 7C, top row). A  
457 representative plant also demonstrated the less stunted phenotype of plants treated  
458 with *NLP2* and *NLP3* single and double deletion strains in comparison to WT infected  
459 plants (Fig 7C, 2nd row). Translating the disease symptoms into the different  
460 categories revealed that about 60% of tested plants exhibited no or only mild  
461 symptoms compared to approximately 25% of the WT-treated plants (Fig 7B).  
462 Infections with the  $\Delta NLP2\Delta NLP3$  strain resulted in a similar disease index compared  
463 to the single deletion strains and, therefore, showed no additive effect of the two  
464 deleted *NLP* genes.

465 In conclusion, the infection study demonstrated that *NLP2* and *NLP3* contribute to  
466 *V. dahliae* JR2 virulence on tomato. Deletion of the genes still resulted in induction of  
467 disease symptoms suggesting that the fungal strains are well able to penetrate the  
468 plant and that Nlp2 and Nlp3 play primarily a role inside of the plant. This is consistent  
469 with the exoproteome approach that identified Nlp2 and Nlp3 as xylem sap-specific  
470 secretion proteins, in accordance with a role during later infection steps in the xylem

471 vessels. These experiments show that our proteomic approach successfully identified  
472 a xylem sap-specific group that includes proteins that are uniquely required in the  
473 xylem sap of the plant. While other tested proteins may have redundant functions, we  
474 were able to identify NLPs, which are only secreted in a specific environment, as  
475 candidates important for *Verticillium* infection.

## 476 Discussion

477 Fungi require sensing and adapting mechanisms throughout their life cycle. Different  
478 environmental cues induce different secretion responses enabling the pathogen to  
479 react to changes in e.g. nutrient supply or host defense responses [42].

480 Our experiments provide evidence for the ability of the allodiploid *V. longisporum* to  
481 distinguish between different environments and to induce media-dependent secretion  
482 responses. *V. longisporum* secretes a general protein response pattern in various non  
483 plant-related media, which reflects a situation outside of the plant. During cultivation in  
484 pectin-rich SXM or plant-extracted xylem sap, the fungus reacts to its surrounding and  
485 secretes specific proteins important for the degradation of plant material and the  
486 colonization of the xylem. These results imply a complex recognition of plant material  
487 in the environment and further show that SXM lacks the full capacity to mimic the  
488 natural growth medium xylem sap.

489 Xylem sap consists of water, plant defense proteins, hormones and low concentrations  
490 of amino acids and sugars that are transported to upper parts of the plant through the  
491 transpiration stream [7, 8]. SXM was developed to mimic the *in planta* environment,  
492 but mainly contains amino acids and the complex carbon source pectin [32]. Pectin is  
493 found in plant cell walls where it strengthens the wall integrity [43]. The degradation of  
494 this complex branched polysaccharide demands the action of several carbohydrate-  
495 active enzymes [39]. This situation is reflected in our SXM-derived exoproteome. In  
496 the SXM-specific and the core exoproteome we found 64 and 90 CAZys, respectively,  
497 of which the enzymes acting on pectin are especially overrepresented with 32 and 20  
498 proteins. Other studies examined the upregulation of fungal genes after *V. dahliae*  
499 root-inoculation of *A. thaliana* seedlings for one day [44]. Of these upregulated genes,  
500 we identified corresponding proteins are found in our xylem sap-specific as well as the  
501 SXM-specific and core exoproteome. Another study on the *V. dahliae* secretome used

502 minimal medium with cotton root fragments [22]. Several secreted proteins were  
503 identified including 12 cellulases, five pectate lyases, two chitinases, 13 proteases and  
504 one cerato-platanin domain containing protein (Cp1) [22]. A number of these proteins  
505 were detected in our SXM-specific and core exoproteome. However, no overlap to our  
506 xylem sap-specific secretome was detected suggesting that the SXM-induced  
507 response of *Verticillium* spp. is more similar to the presence of root fragments. In  
508 contrast, the exoproteome after contact with the living plant shows an overlap to our  
509 SXM- and xylem sap-derived exoproteomes.

510  
511 The xylem sap is a unique niche for fungal growth due to its low and imbalanced  
512 nutrient supply [7, 8]. It therefore is likely quite important for *Verticillium* to recognize  
513 this specific environment and adapt to it by secreting colonization-related proteins. In  
514 prior studies, we demonstrated that *V. longisporum* changes its growth according to  
515 the presence or absence of host xylem sap [31]. The fungus is able to adapt to the  
516 low-nutrient and imbalanced amino acid supply in the xylem sap by activating the  
517 cross-pathway [10]. In filamentous fungi, this process is controlled by the cross-  
518 pathway control transcription factor Cpc1, which is encoded by a homolog of the yeast  
519 gene *GCN4* (general control non-derepressed) [10, 45, 46]. Knockdowns in  
520 *V. longisporum* and knockouts in *V. dahliae* revealed that Cpc1 is required for growth  
521 under amino acid starvation conditions and successful colonization of the host plants  
522 [10]. These findings show that *V. longisporum* senses and reacts to its host  
523 environment to survive.

524 The haploid *V. dahliae* responds differently in a susceptible and tolerant olive cultivar  
525 [47]. In the susceptible cultivar, the fungus significantly induced expression of genes  
526 involved in niche-adaptation, pathogenicity and microsclerotia development [47].  
527 Similarly, the transcriptome of two *V. dahliae* strains with different virulence levels on

528 cotton were analyzed. The strain with reduced virulence exhibited more repressed  
529 genes, of which most are related to pathogenesis [48]. These results corroborate that  
530 the fungus senses its environment and responds with different secretion patterns.  
531 Another tight and fast adapting control mechanism of gene expression lies in chromatin  
532 modifications, which can be induced by environmental changes [49]. Such an  
533 epigenetic-mediated control has been observed for effector expression in  
534 *Leptosphaeria maculans*. Effector genes often reside in AT-rich regions of the genome.  
535 These are associated with heterochromatin and explain the silenced state of effector  
536 expression. Upon leaf infection chromatin-mediated repression is abolished and gene  
537 expression is upregulated in *L. maculans* [50, 51]. As *V. longisporum* responds to the  
538 presence of plant-related compounds by inducing specific exoproteome patterns, it will  
539 be interesting to shed light on a putative chromatin modification contribution to these  
540 unique responses.

541

542 Transcriptional regulators can induce the gene expression of several effectors at once.  
543 For example, the transcription factors Som1, Vta2 and Vta3, that are required for  
544 sequential steps of infection, control similar but also distinct sets of secreted proteins  
545 involved in virulence [52, 53]. All three proteins are involved in the regulation of, for  
546 example, *NLP2* [52, 53]. The expression of the two cytotoxic NLPs, *NLP1* and *NLP2*,  
547 from *V. dahliae* has been analyzed during host colonization. When colonizing tomato  
548 plants, both transcript levels were elevated although only *NLP1* expression was  
549 increased during colonization of tobacco plants. The *in planta* expression of *NLP1* and  
550 *NLP2* corresponds to the infection phenotype of the deletion strains [26]. These results  
551 confirm the hypothesis of a sensitive control mechanism. It shows that effectors may  
552 act host-specifically and are only expressed in suitable hosts supporting the idea of a  
553 fine-tuned response.



554 In this study, we identified two NLPs, Nlp2 and Nlp3, as effectors specifically secreted  
555 in xylem sap. Single and double deletions of the corresponding genes resulted in  
556 compromised pathogenicity on tomato. The *NLP2* single deletion strain was included  
557 as control as it was shown previously to contribute to *V. dahliae* virulence [26]. The  
558 *NLP3* deletion strain was additionally tested for *A. thaliana* root colonization revealing  
559 no differences to WT (Fig 7A). This indicates that Nlp3 is dispensable for root adhesion  
560 or colonization but is required during later steps of the infection. NLPs characteristically  
561 induce necrotic lesions [27] thus supporting their activity inside of the plant.

562 Other xylem sap-specifically enriched candidates did not show an effect on *V. dahliae*  
563 pathogenicity on tomato. This may be due to redundant or greater contributions of the  
564 hundreds of secreted *Verticillium* effectors [29]. Our approach revealed a high number  
565 of CAZys among the *V. longisporum* secretome representing 173 out of the total 399  
566 identified proteins (S4 Table). Overall, the *V. dahliae* genome exhibits a strikingly high  
567 repertoire of CAZys, especially pectin-degrading enzymes [29]. This suggests that  
568 proteins with redundant functions are secreted and explains the WT-like infections of  
569 *V. dahliae* strains lacking one of the tested CAZys (glucoamylase Gla1, putative  
570 polysaccharide mono-oxygenase Cbd1 and  $\alpha$ -amylase Amy1).

571 We identified two metalloproteases, Mep1 and Mep2, belonging to two different groups  
572 of metalloproteases (M36 and M43, respectively) as xylem sap-specific secreted  
573 proteins. Metalloproteases promote fungal virulence by degrading host proteins [54,  
574 55]. Plant chitinases degrade chitin of the fungus, which elicits the plant defense  
575 response [56]. *V. dahliae* possesses the ability to truncate extracellular chitin-binding  
576 domain-containing chitinases [24, 54]. The *V. dahliae* proteome comprises two M43  
577 and six M36 peptidases implicating that other metalloproteases are able to  
578 complement the absence of Mep1 and Mep2. Furthermore, synergistic actions of

579 metallo- and serine proteases have been reported in *F. oxysporum* [54], providing  
580 more evidence for the hypothesis of functional redundancy.

581 We also investigated on the cerato-platanin domain containing proteins Cp1 and Cp2.  
582 Cp1 was first identified in the exoproteome of the *V. dahliae* strain XH-8 when  
583 incubated in minimal medium supplemented with cotton root fragments. In this system,  
584 Cp1 was required for cotton virulence and is suggested to function as a chitin  
585 scavenger to prevent fungal recognition by the plant [22]. We detected Cp1 in our core  
586 exoproteome and included it in our study to investigate on putative synergistic actions  
587 of the two CPs present in the *V. dahliae* genome. Our results show that Cp1 and Cp2  
588 are dispensable for *V. dahliae* pathogenicity on tomato. These results indicate that  
589 effectors may have strain- and host-specific activities.

590 To our knowledge, our proteomic study is the first report identifying the differences  
591 between the secretion responses of *V. longisporum* in host xylem sap, the xylem sap  
592 mimic SXM and other media. Non-plant related environments elicited a similar broad  
593 exoproteome pattern whereas the plant-related media, SXM and xylem sap, induced  
594 similar but also distinct responses. These results indicated that the fungus has the  
595 capacity to sense differences in the presence of plant-related compounds and  
596 therefore rules out SXM as xylem sap mimic. Additionally, our approach identified  
597 necrosis and ethylene inducing-like proteins Nlp2 and Nlp3 in the xylem sap-specific  
598 secretome. These proteins are required for *V. dahliae* pathogenicity with roles in later  
599 steps of infection and display potential targets for control strategies of Verticillium wilt.

## 600 **Materials and Methods**

### 601 **Fungal strains and growth conditions**

602 *Verticillium* strains (S5 Table) were cultivated in liquid simulated xylem medium (SXM)  
603 modified from [32] as described in [57] for conidiospore formation and in liquid potato  
604 dextrose medium (PDM) (Potato Dextrose broth (Carl Roth)) for mycelial growth.  
605 Cultures were incubated at 25°C under constant agitation at 115 – 125 rpm. For long-  
606 term storage spores were maintained in closed vials with 25% glycerol at -80°C.  
607 For the exoproteome comparison, *V. longisporum* 43 (VI43) was inoculated with  
608  $1.5 \times 10^6$  spores per 150 ml PDM (150 rpm) and incubated for four days. Each culture  
609 was centrifuged and the mycelium and spore sediment was resuspended in 150 ml  
610 extracted xylem sap of *B. napus*; SXM, the minimal medium Czapek-Dox medium  
611 (CDM, modified from [58] and [59]) supplemented with 7% extracted xylem sap or plant  
612 proteins; H<sub>2</sub>O and H<sub>2</sub>O supplemented with 0.1% glucose; YNB (yeast nitrogen base:  
613 1.5 g/l YNB, 5 g/l (NH<sub>4</sub>)<sub>2</sub>SO<sub>4</sub>, 20 g/l glucose, ad 1 l H<sub>2</sub>O) and vegetable juice (V8,  
614 Campbell Soup Company). After an additional incubation period of four days, proteins  
615 of the supernatant were precipitated with TCA/acetone.

616

### 617 **Xylem sap extraction**

618 Xylem sap was extracted from *B. napus* (Falcon, Norddeutsche Pflanzensucht). Seeds  
619 were surface sterilized with 70% ethanol and sown on sand. Plants were grown at long-  
620 day condition (16h light: 8h dark) and 22°C. Seven-day-old seedlings were transferred  
621 into a soil/sand (1: 1) mixture and grown for 42 days. To extract the xylem sap, plants  
622 were cut at the height of the first internode and the xylem sap was collected. The xylem  
623 sap was filtered through Vivaspin 15R centrifugal concentrators (Sartorius) and directly  
624 used as medium for inoculation.

625

## 626 **Genomic DNA Extraction**

627 For isolation of genomic DNA (gDNA) from fungal powder, the method modified from  
628 [60] was used. The fine powder was mixed with 800  $\mu$ l of lysis buffer (50 mM Tris  
629 (pH 7.5), 50 mM EDTA (pH 8), 3% (w/v) SDS and 1% (v/v)  $\beta$ -mercaptoethanol) and  
630 incubated at 65°C for one hour. Before the mixture was centrifuged for 20 min at  
631 13000 rpm, 800  $\mu$ l phenol were added. The upper aqueous phase was transferred to  
632 a new tube. To denature the proteins, 500  $\mu$ l chloroform were added, mixed and  
633 centrifuged for 10 min at 13000 rpm. The upper phase was mixed with 400  $\mu$ l of  
634 isopropanol for precipitation of gDNA and centrifuged for 2 min at 13000 rpm. The  
635 sedimented gDNA was washed with 70% (v/v) ethanol. The gDNA was dried at 65°C  
636 for approximately 25 min before it was dissolved in up to 100  $\mu$ l deionized H<sub>2</sub>O  
637 containing 2  $\mu$ l RNase A (10 mg/ml) and treated at 65°C for 30 min to remove RNA.

638

## 639 **Plasmid and strain construction**

640 The desired genes and flanking regions for plasmid construction were amplified of  
641 *V. dahliae* JR2 WT gDNA with the Phusion High Fidelity Polymerase, *Taq* DNA  
642 Polymerase (both Thermo Fisher Scientific) or Q5 High Fidelity Polymerase (New  
643 England Biolabs). Primers are listed in S6 Table.

644 GeneArt Seamless Cloning and Assembly Kit (Thermo Fisher Scientific) was used for  
645 the cloning strategy. Plasmids are listed in S7 Table. *E. coli* strain DH5 $\alpha$  was utilized  
646 for cloning reactions and propagation of plasmids. Transformation of *E. coli* was  
647 performed based on a heat shock method [61]. *A. tumefaciens* AGL-1 cells were  
648 transformed with the desired plasmids via a freeze-thaw method [62] and was then  
649 utilized for an *A. tumefaciens* mediated transformation of *V. dahliae* spores, which was  
650 performed based on the method described by [63]. Details on specific mutant strains  
651 in haploid *V. dahliae* are given in S1 Text.

652

### 653 **Southern hybridization analysis**

654 For verification of *V. dahliae* deletion strains, the corresponding flanking region of the  
655 gene was amplified and labeled as probe. Genomic DNAs were restricted with  
656 indicated enzymes overnight. The mixture was separated on a 1% agarose gel, and  
657 DNA was transferred to a Hybond-N membrane (GE Healthcare) by blotting. DNA on  
658 the membrane was hybridized overnight to the probe. CDP-Star Detection reagent (GE  
659 Healthcare) was used to detect chemiluminescence signals according to the  
660 manufacturer's instructions.

661

### 662 **Protein assays and western hybridization analysis**

663 Extracellular proteins from the supernatant of SXM cultures were precipitated with  
664 10% TCA (w/v) in acetone at 4°C overnight. This mixture was centrifuged at 4 000 rpm  
665 for 60 min at 4°C. The protein sediment was washed three times with 80% (v/v)  
666 acetone, once with 100% (v/v) acetone and then dissolved in 8 M urea/ 2 M thiourea.  
667 Intracellular proteins were extracted from ground mycelium with extraction buffer  
668 (300 mM NaCl, 100 mM Tris-HCl pH 7.5, 10% glycerol, 1 mM EDTA, 0.02% NP-40,  
669 2 mM DTT and complete EDTA-free protease inhibitor cocktail (Roche)). Samples  
670 were centrifuged for 20 min at 13 000 rpm at 4°C and the supernatants were  
671 transferred into fresh test tubes. Protein concentrations were determined using a  
672 Bradford-based Roti-Quant assay (Carl Roth). Protein samples were separated in 12%  
673 SDS-PAGE gels, followed by protein transfer onto an Amersham Protran 0.45 µm  
674 nitrocellulose membrane (GE Healthcare). The membrane was blocked in 5% (w/v)  
675 skim milk powder in TBS-T (10 mM Tris-HCl (pH 8), 150 mM NaCl, 0.05% (w/v) Tween  
676 20) and probed with α-GFP antibody (Santa Cruz Biotechnology). As secondary  
677 antibody the horseradish peroxidase-coupled α-mouse antibody (115-035-003,

678 Jackson ImmunoResearch) was applied. Detection of chemiluminescent signals was  
679 conducted with horseradish peroxidase substrate luminol based chemiluminescence.

680

### 681 **Tryptic digestion, mass spectrometry analysis and protein identification**

682 For one-dimensional gel analysis 30 µg of the extracellular protein extract was  
683 separated by 12% SDS-PAGE gels. The polyacrylamide gels were incubated 1h in  
684 fixing solution (40% (v/v) ethanol, 10% (v/v) acetic acid) and washed twice for 20 min  
685 with H<sub>2</sub>O. Gels were colloidal Coomassie stained (0.12% (w/v) CBB G-250, 5% (w/v)  
686 aluminum sulphate-(14-18)-hydrate, 10% (v/v) methanol, 2% (v/v) orthophosphoric  
687 acid (85%)) and two lanes for each growth condition were cut into ten pieces of equal  
688 size. The excised polyacrylamide gels were in-gel digested with trypsin [64]. Resulting  
689 tryptic peptide mixtures were separated by a reversed-phase liquid chromatographic  
690 column (Acclaim PepMap RSLC column, 75 µm x 15 cm, C18, 3 µm, 100 Å,  
691 P/N164534, Thermo Fisher Scientific) to further reduce sample complexity prior to  
692 mass analyses with an LTQ Velos Pro mass spectrometer (Thermo Fisher Scientific).  
693 To identify matches of the detected peptides an in-house genome-wide protein  
694 sequence database of *Verticillium longisporum* was used of which the protein  
695 sequences are given in S1 Table. Analysis was performed by a Thermo Proteome  
696 Discoverer (version 1.3) workflow that integrates Sequest and Mascot search engines.  
697 For the search an initial precursor mass tolerance of 10 ppm and fragment mass  
698 tolerance of 0.8 Da Carbamidomethylcysteine was used as fixed modification.  
699 Oxidized methionine was included as variable modification and two miscleavages were  
700 allowed for each peptide. For peptide and protein validation, a 0.5% false discovery  
701 rate was set and determined by using peptide validator with a reverse decoy database.  
702 Resulting lists of identified proteins were semi-quantitatively processed using the  
703 Marvis Suite software [34]. Only proteins with a WoLF PSORT extracellular localization

704 prediction of above 12 were considered for further characterization [65]. A group of  
705 445 identified proteins fulfilled the criteria of a threshold of 1 peptide and a high  
706 intensity ratio of 0.83 in one condition. The protein sequences of the 445 proteins, and  
707 details on their abundance as measured by identified peptides, are given in S1 Table.  
708 The signal-to-level (s/l) ratio (see MarVis-Suite handbook on <http://marvis.gobics.de>)  
709 was calculated using as signal the difference between SXM and xylem sap condition  
710 averages (or vice versa) and as level the corresponding maximum. Polypeptides with  
711 an s/l ratio above 0.3 were considered as candidates with higher intensities in the  
712 specific medium and therefore belong to the specifically enriched proteins. Xylem sap-  
713 specific proteins are depicted in green and SXM-specific proteins in red. Whereas an  
714 s/l ratio below 0.3 was considered not to be specifically enriched and formed the shared  
715 core proteome.

716 The list of proteins was further analyzed and compared to the Ensembl Fungi  
717 annotations which are more robust. Candidates with no proper predictions in our  
718 preliminary genome-wide protein sequence database of *V. longisporum* (e.g. stop  
719 codons in protein sequences, two genes annotated as one) were revealed by  
720 comparison with corresponding *V. dahliae* JR2 and *V. alfalfae* VaMs.102 sequences  
721 and eliminated from the list. Further analyses are based on the *V. dahliae* JR2 or the  
722 *V. alfalfae* VaMs.102 protein sequences [35]. Domain predictions and associated  
723 families were obtained with InterProScan [36] and classification of carbohydrate-active  
724 enzyme (CAZys) families according to the CAZy database (<http://www.cazy.org>) was  
725 specified with dbCAN2 [37] to address putative functions of the proteins. Proteins were  
726 considered as putatively secreted with at least one predicted signal peptide by  
727 InterProScan [36] or SignalP-5.0 [66] or as long as it passed the threshold of 12 as  
728 determined by WoLF PSORT [65] for the *V. longisporum* 43, *V. dahliae* JR2 or  
729 *V. alfalfae* VaMs.102 protein sequence. All details are given in S2 Table.

730

731 **A. *thaliana* root infection assay**

732 *A. thaliana* (Col-0, N1902; Nottingham Arabidopsis Stock Centre) seedlings were  
733 inoculated by root-dipping with a conidia suspension of *V. dahliae* JR2 and *NLP3*  
734 deletion strain overexpressing *GFP* ( $1 \times 10^7$  spores/ml) based on the method described  
735 by colleagues [53]. Three-week-old seedlings were used for infection. The roots were  
736 incubated in spore solutions with 100 000 spores/ml for 35 minutes. The plates were  
737 further incubated in the plant chamber at long day conditions (22-25°C) and  
738 colonization on the roots was monitored at indicated time points. The root was  
739 incubated in a staining solution (0.0025% (v/v) propidium iodide, 0.005% (v/v) silwet)  
740 for five minutes in the dark. Images of infected roots were taken with a Zeiss Observer  
741 Z1 microscope equipped with CSU-X1 A1 confocal scanner unit (Yokogawa),  
742 QuandtEM:512SC (Photometrics) digital camera and Slidebook 5.0 software package  
743 (Intelligent Imaging Innovations).

744

745 **Tomato infection assay**

746 *Solanum lycopersicum* (Moneymaker, Bruno Nebelung Kiepenkerl-  
747 Pflanzenzüchtung) seeds were surface sterilized with 70% (v/v) EtOH, 0.05%  
748 Tween 20, sown on sand/soil (1:1) mixture (Dorsilit, Archut). Plants were grown under  
749 a photoperiod of 16 h light and 8 h of darkness at 25 and 22°C, respectively. The  
750 tomato pathogenicity assays were performed on ten-day-old *S. lycopersicum*  
751 seedlings. The plants were root-inoculated by incubating the roots in 50 ml of  $10^7$   
752 spores/ml for 40 min under constant agitation at ~35 rpm. Mock control plants were  
753 treated similarly with dH<sub>2</sub>O.

754 The seedlings were transferred to pots containing a sand/soil (1:1) mixture and  
755 3 000 000 spores or 3 ml dH<sub>2</sub>O for mock plants were added to the soil. For each strain



756 or control 15 plants were infected. Plants were incubated in the climate chamber at  
757 long day conditions for another 21 days before disease symptoms were scored. The  
758 fresh weight of the aerial parts, the length of the longest leaf and the height of the  
759 vegetation point were measured. These parameters were calculated into a disease  
760 score ranking relative to uninfected mock plants. The mean values of mock plants of  
761 each parameter were set to 100%. All values above 80% were assigned as 'healthy',  
762 60-80% as 'mild symptoms', 40-80% as 'strong symptoms', lower than 40% as 'very  
763 strong symptoms' and dead plants as 'dead'. The scores for each strain were  
764 visualized in a stack diagram displaying the number of plants per disease score relative  
765 to the total amount of tested plants from all experiments. As another measure the  
766 discoloration of the tomato hypocotyl was observed with a binocular microscope  
767 SZX12-ILLB2-200 from Olympus. All treated plants were tested for fungal outgrowth  
768 21 days after infection. The tomato stems were surface sterilized in 70% ethanol,  
769 followed by 6% hypochlorite solution each for 8 min before two washing steps with  
770 dH<sub>2</sub>O. Stem ends were removed and slices were placed on PDM plates containing 100  
771 µg/ml chloramphenicol. After incubation of seven days at 25°C the fungal outgrowth  
772 was observed. The pathogenicity assay was performed once with the metalloprotease  
773 constructs and once with  $\Delta GLA1$ ,  $\Delta CBD1$  and  $\Delta AMY1$  strains. Pathogenicity assays  
774 with the *CP* and *NLP* constructs were repeated twice. For each assay 15 plants were  
775 infected with WT and 15 plants were used as mock control. Per transformant 15 plants  
776 were infected and scores of identical strains were taken together of two individual  
777 transformants.

778

### 779 **Accession numbers**

780 Sequence data for *V. dahliae* were retrieved from Ensembl Fungi with the following  
781 accession numbers: *NLP2* (*VDAG\_JR2\_Chr2g05460a*), *NLP3*

782 (VDAG\_JR2\_Chr4g05950a), CP1 (VDAG\_JR2\_Chr7g00860a), CP2  
783 (VDAG\_JR2\_Chr2g07000a), MEP1 (VDAG\_JR2\_Chr8g09760a), MEP2  
784 (VDAG\_JR2\_Chr1g21900a), GLA1 (VDAG\_JR2\_Chr8g11020a), CBD1  
785 (VDAG\_JR2\_Chr4g04440a), AMY1 (VDAG\_JR2\_Chr7g03330a). Protein sequences  
786 for *V. longisporum* are given in S1 Table as retrieved from an in-house database or  
787 taken from Ensembl Fungi.

788

## 789 **Acknowledgments**

790 The authors thank N. Scheiter for technical assistance and A. Keyl and A. Pelizaeus  
791 for help with the experimental work during lab rotations. This research has been funded  
792 by the German Research Foundation (DFG, IRTG 2172 “PRoTECT” program of the  
793 Göttingen Graduate Center of Neurosciences, Biophysics, and Molecular Biosciences)  
794 to ML, JS, IM, AN, GHB, and IF, the Federal Ministry of Education and Research  
795 (BMBF “BioFung”, FKZ 0315595) to AK, ML, SB-S, GHB, BM and IF and an NSERC  
796 CREATE award to JWK.

## 797 **References**

- 798 1. Klosterman SJ, Atallah ZK, Vallad GE, Subbarao KV. Diversity, pathogenicity,  
799 and management of *Verticillium* species. *Annu Rev Phytopathol.* 2009. 47: 39–  
800 62.
- 801 2. Inderbitzin P, Subbarao KV. *Verticillium* systematics and evolution: how  
802 confusion impedes *Verticillium* wilt management and how to resolve it.  
803 *Phytopathology.* 2014. 104: 564–574.
- 804 3. Dunker S, Keunecke H, Steinbach P, von Tiedemann A. Impact of *Verticillium*  
805 *longisporum* on yield and morphology of winter oilseed rape (*Brassica napus*) in  
806 relation to systemic spread in the plant. *J Phytopathol.* 2008. 156: 698–707.
- 807 4. Eynck C, Koopmann B, Grunewaldt-Stoecker G, Karlovsky P, von Tiedemann  
808 A. Differential interactions of *Verticillium longisporum* and *V. dahliae* with  
809 *Brassica napus* detected with molecular and histological techniques. *Eur J Plant*  
810 *Pathol.* 2007. 118: 259–274.
- 811 5. Fradin EF, Thomma BPHJ. Physiology and molecular aspects of *Verticillium* wilt  
812 diseases caused by *V. dahliae* and *V. albo-atrum*. *Mol Plant Pathol.* 2006. 7: 71–  
813 86.
- 814 6. de Boer AH, Volkov V. Logistics of water and salt transport through the plant:  
815 structure and functioning of the xylem. *Plant, Cell Environ.* 2003. 26: 87–101.
- 816 7. Singh S, Braus-Stromeier SA, Timpner C, Tran VT, Lohaus G, Reusche M, et  
817 al. Silencing of *Vlaro2* for chorismate synthase revealed that the phytopathogen  
818 *Verticillium longisporum* induces the cross-pathway control in the xylem. *Appl*  
819 *Microbiol Biotechnol.* 2010. 85: 1961–1976.
- 820 8. Carella P, Wilson DC, Kempthorne CJ, Cameron RK. Vascular sap proteomics:  
821 Providing insight into long-distance signaling during stress. *Front Plant Sci.*  
822 2016. 7: 651.

- 823 9. Floerl S, Druebert C, Majcherczyk A, Karlovsky P, Kües U, Polle A. Defence  
824 reactions in the apoplastic proteome of oilseed rape (*Brassica napus* var. *napus*)  
825 attenuate *Verticillium longisporum* growth but not disease symptoms. BMC Plant  
826 Biol. 2008. 8: 129.
- 827 10. Timpner C, Braus-Stromeyer SA, Tran VT, Braus GH. The Cpc1 regulator of the  
828 cross-pathway control of amino acid biosynthesis is required for pathogenicity of  
829 the vascular pathogen *Verticillium longisporum*. Mol Plant-Microbe Interact.  
830 2013. 26: 1312–1324.
- 831 11. Isshiki A, Akimitsu K, Yamamoto M, Yamamoto H. Endopolygalacturonase is  
832 essential for citrus black rot caused by *Alternaria citri* but not brown spot caused  
833 by *Alternaria alternata*. Mol Plant-Microbe Interact. 2001. 14: 749–757.
- 834 12. Yakoby N, Beno-Moualem D, Keen NT, Dinoor A, Pines O, Prusky D.  
835 *Colletotrichum gloeosporioides pelB* is an important virulence factor in avocado  
836 fruit-fungus interaction. Mol Plant-Microbe Interact. 2001. 14: 988–995.
- 837 13. Oeser B, Heidrich PM, Müller U, Tudzynski P, Tenberge KB. Polygalacturonase  
838 is a pathogenicity factor in the *Claviceps purpurea*/rye interaction. Fungal Genet  
839 Biol. 2002. 36: 176–186.
- 840 14. Voigt CA, Schäfer W, Salomon S. A secreted lipase of *Fusarium graminearum*  
841 is a virulence factor required for infection of cereals. Plant J. 2005. 42: 364–375.
- 842 15. Brito N, Espino JJ, González C. The endo-beta-1,4-xylanase xyn11A is required  
843 for virulence in *Botrytis cinerea*. Mol Plant-Microbe Interact. 2006. 19: 25–32.
- 844 16. Sorrell TC, Chen SCA. Fungal-derived immune modulating molecules. In: Fallon  
845 PG (ed) Pathogen-derived immunomodulatory molecules. Advances in  
846 Experimental Medicine and Biology. New York, NY: Springer, 2009, pp. 108–  
847 120.
- 848 17. Dodds PN, Rathjen JP. Plant immunity: towards an integrated view of plant–

- 849 pathogen interactions. *Nat Rev Genet.* 2010. 11: 539–548.
- 850 18. Lo Presti L, Lanver D, Schweizer G, Tanaka S, Liang L, Tollot M, et al. Fungal  
851 effectors and plant susceptibility. *Annu Rev Plant Biol.* 2015. 66: 513–545.
- 852 19. van Esse HP, Bolton MD, Stergiopoulos I, de Wit PJGM, Thomma BPHJ. The  
853 chitin-binding *Cladosporium fulvum* effector protein Avr4 is a virulence factor.  
854 *Mol Plant-Microbe Interact.* 2007. 20: 1092–1101.
- 855 20. de Jonge R, van Esse HP, Kombrink A, Shinya T, Desaki Y, Bours R, et al.  
856 Conserved fungal LysM effector Ecp6 prevents chitin-triggered immunity in  
857 plants. *Science.* 2010. 329: 953–955.
- 858 21. Volk H, Marton K, Flajšman M, Radišek S, Tian H, Hein I, et al. Chitin-binding  
859 protein of *Verticillium nonalfalfae* disguises fungus from plant chitinases and  
860 suppresses chitin-triggered host immunity. *Mol Plant-Microbe Interact.* 2019. 32:  
861 1378–1390.
- 862 22. Zhang Y, Gao Y, Liang Y, Dong Y, Yang X, Yuan J, et al. The *Verticillium dahliae*  
863 SnodProt1-like protein VdCP1 contributes to virulence and triggers the plant  
864 immune system. *Front Plant Sci.* 2017. 8: 1880.
- 865 23. Naumann TA, Wicklow DT, Price NPJ. Identification of a chitinase-modifying  
866 protein from *Fusarium verticillioides*: truncation of a host resistance protein by a  
867 fungalysin metalloprotease. *J Biol Chem.* 2011. 286: 35358–66.
- 868 24. Han LB, Li YB, Wang FX, Wang WY, Liu J, Wu JH, et al. The cotton apoplastic  
869 protein CRR1 stabilizes chitinase 28 to facilitate defense against the fungal  
870 pathogen *Verticillium dahliae*. *Plant Cell.* 2019. 31: 520–536.
- 871 25. Gijzen M, Nürnberger T. Nep1-like proteins from plant pathogens: Recruitment  
872 and diversification of the NPP1 domain across taxa. *Phytochemistry.* 2006. 67:  
873 1800–1807.
- 874 26. Santhanam P, van Esse HP, Albert I, Faino L, Nürnberger T, Thomma BPHJ.

- 875 Evidence for functional diversification within a fungal NEP1-like protein family.  
876 Mol Plant-Microbe Interact. 2013. 26: 278–286.
- 877 27. Zhou BJ, Jia PS, Gao F, Guo HS. Molecular characterization and functional  
878 analysis of a necrosis-and ethylene-inducing, protein-encoding gene family from  
879 *Verticillium dahliae*. Mol Plant-Microbe Interact. 2012. 25: 964–975.
- 880 28. Marton K, Flajsman M, Radisek S, Kosmelj K, Jakse J, Javornik B, et al.  
881 Comprehensive analysis of *Verticillium nonalfalfae in silico* secretome uncovers  
882 putative effector proteins expressed during hop invasion. PLoS One. 2018. 13:  
883 e0198971.
- 884 29. Klosterman SJ, Subbarao KV., Kang S, Veronese P, Gold SE, Thomma BPHJ,  
885 et al. Comparative genomics yields insights into niche adaptation of plant  
886 vascular wilt pathogens. PLoS Pathog. 2011. 7: e1002137.
- 887 30. Yellareddygari SKR, Gudmestad NC. Effect of soil temperature, injection depth,  
888 and rate of metam sodium efficacy in fine-textured soils with high organic matter  
889 on the management of *Verticillium* wilt of potato. Am J Potato Res. 2018. 95:  
890 413–422.
- 891 31. Singh S, Braus-Stromeyer SA, Timpner C, Valerius O, von Tiedemann A,  
892 Karlovsky P, et al. The plant host *Brassica napus* induces in the pathogen  
893 *Verticillium longisporum* the expression of functional catalase peroxidase which  
894 is required for the late phase of disease. Mol Plant-Microbe Interact. 2012. 25:  
895 569–581.
- 896 32. Neumann MJ, Dobinson KF. Sequence tag analysis of gene expression during  
897 pathogenic growth and microsclerotia development in the vascular wilt pathogen  
898 *Verticillium dahliae*. Fungal Genet Biol. 2003. 38: 54–62.
- 899 33. Mandelc S, Javornik B. The secretome of vascular wilt pathogen *Verticillium*  
900 *albo-atrum* in simulated xylem fluid. Proteomics. 2015. 15: 787–797.

- 901 34. Kaefer A, Landesfeind M, Possienke M, Feussner K, Feussner I, Meinicke P.  
902 MarVis-filter: Ranking, filtering, adduct and isotope correction of mass  
903 spectrometry data. *J Biomed Biotechnol.* 2012. 2012: 263910.
- 904 35. Kersey PJ, Allen JE, Allot A, Barba M, Boddu S, Bolt BJ, et al. Ensembl  
905 Genomes 2018: An integrated omics infrastructure for non-vertebrate species.  
906 *Nucleic Acids Res.* 2018. 46: D802–D808.
- 907 36. Jones P, Binns D, Chang HY, Fraser M, Li W, McAnulla C, et al. InterProScan  
908 5: Genome-scale protein function classification. *Bioinformatics.* 2014. 30: 1236–  
909 1240.
- 910 37. Zhang H, Yohe T, Huang L, Entwistle S, Wu P, Yang Z, et al. dbCAN2: A meta  
911 server for automated carbohydrate-active enzyme annotation. *Nucleic Acids*  
912 *Res.* 2018. 46: W95–W101.
- 913 38. Lombard V, Golaconda Ramulu H, Drula E, Coutinho PM, Henrissat B. The  
914 carbohydrate-active enzymes database (CAZy) in 2013. *Nucleic Acids Res.*  
915 2014. 42: D490-495.
- 916 39. Yang Y, Zhang Y, Li B, Yang X, Dong Y, Qiu D. A *Verticillium dahliae* pectate  
917 lyase induces plant immune responses and contributes to virulence. *Front Plant*  
918 *Sci.* 2018. 9: 1271.
- 919 40. Gui YJ, Chen JY, Zhang DD, Li NY, Li TG, Zhang WQ, et al. *Verticillium dahliae*  
920 manipulates plant immunity by glycoside hydrolase 12 proteins in conjunction  
921 with carbohydrate-binding module 1. *Environ Microbiol.* 2017. 19: 1914–1932.
- 922 41. Wang JY, Cai Y, Gou JY, Mao YB, Xu YH, Jiang WH, et al. VdNEP, an elicitor  
923 from *Verticillium dahliae*, induces cotton plant wilting. *Appl Environ Microbiol.*  
924 2004. 70: 4989–4995.
- 925 42. McCotter SW, Horianopoulos LC, Kronstad JW. Regulation of the fungal  
926 secretome. *Curr Genet.* 2016. 62: 533–545.

- 927 43. Yadeta KA, J. Thomma BPH. The xylem as battleground for plant hosts and  
928 vascular wilt pathogens. *Front Plant Sci.* 2013. 4: 97.
- 929 44. Scholz SS, Schmidt-Heck W, Guthke R, Furch ACU, Reichelt M, Gershenzon J,  
930 et al. *Verticillium dahliae*-*Arabidopsis* interaction causes changes in gene  
931 expression profiles and jasmonate levels on different time scales. *Front*  
932 *Microbiol.* 2018. 9: 217.
- 933 45. Mösch HU, Scheier B, Lahti R, Mäntsälä P, Braus GH. Transcriptional activation  
934 of yeast nucleotide biosynthetic gene *ADE4* by GCN4. *J Biol Chem.* 1991. 266:  
935 20453–20456.
- 936 46. Hoffmann B, Valerius O, Andermann M, Braus GH. Transcriptional  
937 autoregulation and inhibition of mRNA translation of amino acid regulator gene  
938 *cpcA* of filamentous fungus *Aspergillus nidulans*. *Mol Biol Cell.* 2001. 12: 2846–  
939 2857.
- 940 47. Jiménez-Ruiz J, Leyva-Pérez M de la O, Cabanás CGL, Barroso JB, Luque F,  
941 Mercado-Blanco J. The transcriptome of *Verticillium dahliae* responds  
942 differentially depending on the disease susceptibility level of the olive (*Olea*  
943 *europaea* L.) cultivar. *Genes (Basel).* 2019. 10: 251.
- 944 48. Jin L, Chen D, Liao S, Zhang Y, Yu F, Wan P, et al. Transcriptome analysis  
945 reveals downregulation of virulence-associated genes expression in a low  
946 virulence *Verticillium dahliae* strain. *Arch Microbiol.* 2019. 201: 927–941.
- 947 49. Seidl MF, Cook DE, Thomma BPHJ. Chromatin biology impacts adaptive  
948 evolution of filamentous plant pathogens. *PLoS Pathog.* 2016. 12: e1005920.
- 949 50. Tan KC, Oliver RP. Regulation of proteinaceous effector expression in  
950 phytopathogenic fungi. *PLoS Pathog.* 2017. 13: e1006241.
- 951 51. Soyer JL, El Ghalid M, Glaser N, Ollivier B, Linglin J, Grandaubert J, et al.  
952 Epigenetic control of effector gene expression in the plant pathogenic fungus



- 953 *Leptosphaeria maculans*. PLoS Genet. 2014. 10: e1004227.
- 954 52. Tran VT, Braus-Stromeier SA, Kusch H, Reusche M, Kaefer A, Kühn A, et al.  
955 *Verticillium* transcription activator of adhesion Vta2 suppresses microsclerotia  
956 formation and is required for systemic infection of plant roots. New Phytol. 2014.  
957 202: 565–581.
- 958 53. Bui T, Harting R, Braus-Stromeier SA, Tran V, Leonard M, Höfer A, et al.  
959 *Verticillium dahliae* transcription factors Som1 and Vta3 control microsclerotia  
960 formation and sequential steps of plant root penetration and colonisation to  
961 induce disease. New Phytol. 2019. 221: 2138–2159.
- 962 54. Jashni MK, Dols IHM, Iida Y, Boeren S, Beenen HG, Mehrabi R, et al. Synergistic  
963 action of a metalloprotease and a serine protease from *Fusarium oxysporum* f.  
964 sp. *lycopersici* cleaves chitin-binding tomato chitinases, reduces their antifungal  
965 activity, and enhances fungal virulence. Mol Plant-Microbe Interact. 2015. 28:  
966 996–1008.
- 967 55. Brouta F, Descamps F, Monod M, Vermout S, Losson B, Mignon B. Secreted  
968 metalloprotease gene family of *Microsporum canis*. Infect Immun. 2002. 70:  
969 5676–5683.
- 970 56. Naumann TA, Price NPJ. Truncation of class IV chitinases from *Arabidopsis* by  
971 secreted fungal proteases. Mol Plant Pathol. 2012. 13: 1135–1139.
- 972 57. Hollensteiner J, Wemheuer F, Harting R, Kolarzyk AM, Diaz Valerio SM,  
973 Poehlein A, et al. *Bacillus thuringiensis* and *Bacillus weihenstephanensis* inhibit  
974 the growth of phytopathogenic *Verticillium* species. Front Microbiol. 2017. 7:  
975 2171.
- 976 58. Czapek F. Untersuchungen über die Stickstoffgewinnung und Eiweißbildung der  
977 Pflanzen. Beiträge zur Chem Physiol und Pathol 1. 1902. 1: 538–560.
- 978 59. Dox AW. The intracellular enzymes of *Penicillium* and *Aspergillus*, with special

- 979 references to those of *Penicillium camemberti*. Washington, D.C.: U.S. Dept. of  
980 Agriculture, Bureau of Animal Industry, 1910.
- 981 60. Kolar M, Punt PJ, van den Hondel CAMJJ, Schwab H. Transformation of  
982 *Penicillium chrysogenum* using dominant selection markers and expression of  
983 an *Escherichia coli lacZ* fusion gene. *Gene*. 1988. 62: 127–134.
- 984 61. Inoue H, Nojima H, Okayama H. High efficiency transformation of *Escherichia*  
985 *coli* with plasmids. *Gene*. 1990. 96: 23–28.
- 986 62. Jyothishwaran G, Kotresha D, Selvaraj T, Srideshikan SH, Rajvanshi PK,  
987 Jayabaskaran C. A modified freeze–thaw method for efficient transformation of  
988 *Agrobacterium tumefaciens*. *Curr Sci*. 2007. 93: 770–772.
- 989 63. Mullins ED, Chen X, Romaine P, Raina R, Geiser DM, Kang S. *Agrobacterium-*  
990 *mediated transformation of Fusarium oxysporum*: An efficient tool for insertional  
991 mutagenesis and gene transfer. *Phytopathology*. 2001. 91: 173–180.
- 992 64. Shevchenko A, Wilm M, Vorm O, Mann M. Mass spectrometric sequencing of  
993 proteins from silver-stained polyacrylamide gels. *Anal Chem*. 1996. 68: 850–  
994 858.
- 995 65. Horton P, Park KJ, Obayashi T, Fujita N, Harada H, Adams-Collier CJ, et al.  
996 WoLF PSORT: Protein localization predictor. *Nucleic Acids Res*. 2007. 35:  
997 W585–W587.
- 998 66. Almagro Armenteros JJ, Tsirigos KD, Sønderby CK, Petersen TN, Winther O,  
999 Brunak S, et al. SignalP 5.0 improves signal peptide predictions using deep  
1000 neural networks. *Nat Biotechnol*. 2019. 37: 420–423.
- 1001 67. Meinicke P, Lingner T, Kaefer A, Feussner K, Göbel C, Feussner I, et al.  
1002 Metabolite-based clustering and visualization of mass spectrometry data using  
1003 one-dimensional self-organizing maps. *Algorithms Mol Biol*. 2008. 3: 9.  
1004

## 1005 **Figures**

### 1006 **Fig 1. Exoproteome signatures of *V. longisporum* in different growth media.**

1007 *V. longisporum* 43 was cultivated in complete medium (PDM) for four days before the  
1008 sedimented mycelia and spores were dissolved in different media (dH<sub>2</sub>O, dH<sub>2</sub>O + 0.1%  
1009 glucose, yeast nitrogen base (YNB), vegetable juice (V8), minimal medium (CDM)  
1010 supplemented with 7% xylem sap or plant proteins, simulated xylem medium (SXM)  
1011 and extracted xylem sap from *B. napus*) and cultivated for four more days. **(A)**  
1012 Precipitated proteins from the supernatants were separated by one-dimensional SDS-  
1013 PAGE. The colloidal Coomassie stained exoproteome samples on gel displayed a  
1014 strong variation between the protein band distributions of all different culture  
1015 conditions. Lanes M represent the molecular weight marker. Complete lanes of the  
1016 *V. longisporum* exoproteomes were subjected to tryptical protein digestion and the  
1017 resulting peptides were analyzed by LC MS/MS. **(B)** Clustering analysis of protein  
1018 abundances (spectral counts) was facilitated by the software MarVis and is visualized  
1019 as one-dimensional self-organizing maps. Rows represent the compared growth  
1020 conditions. The spectral counts were normalized and color-coded according to the  
1021 indicated scale. Red indicates increased, dark blue no spectral counts. **(C)** The  
1022 principle component analysis plot of the exoproteomes based on the spectral counts  
1023 was performed with MarVis-software [67]. Each dot represents one biological replicate  
1024 (one independent culture). The compared exoproteome signatures cluster in three  
1025 groups: a first cluster is formed by all xylem sap culture samples (blue circle); the  
1026 second cluster contains all SXM culture samples (red circle) and the third cluster  
1027 consists of all other samples (black circle).

1028

1029 **Fig 2. Comparison of exoproteome signatures for *V. longisporum* growth in**  
1030 **xylem sap and pectin-rich simulated xylem medium.**

1031 Complete lanes of the SDS-gel with samples of *V. longisporum* simulated xylem  
1032 medium (SXM) and xylem sap derived exoproteomes were subjected to tryptical  
1033 protein digestion and the resulting peptides were analyzed by LC MS/MS. The  
1034 obtained raw data were searched with Proteome Discoverer Software 1.3™ against a  
1035 draft genome-wide protein sequence database of *V. longisporum*. Lists of identified  
1036 proteins were semi-quantitatively processed using MarVis-Suite [34]. Single proteins  
1037 with identifiers are found in S1 Table. **(A)** Clustering analysis of protein abundances  
1038 (spectral counts) is visualized as one-dimensional self-organizing maps, which was  
1039 facilitated by the software MarVis. Upper and lower rows represent the two compared  
1040 growth conditions xylem sap and pectin-rich SXM, respectively. Each column  
1041 corresponds to spectral counts of one identified protein. The spectral counts were  
1042 normalized and color-coded according to the indicated scale. Red indicates increased,  
1043 dark blue no spectral counts. **(B-E)** BLAST searches of identified *V. longisporum*  
1044 proteins in **A** against the *V. dahliae* JR2 and the *V. alfalfae* VaMs.102 proteomes from  
1045 Ensembl Fungi [35] were conducted and functional analysis is based on the *V. dahliae*  
1046 JR2 or *V. alfalfae* VaMs.102 protein sequences. **(B)** The Venn diagram displays the  
1047 number of proteins specifically enriched in xylem sap (blue) and proteins enriched in  
1048 SXM (red). All proteins below the statistical threshold form the core exoproteome that  
1049 is similarly enriched in both media (violet). **(C)** The cake diagram shows the functional  
1050 classification of the 399 identified secreted proteins into main protein groups according  
1051 to their predicted domains. **(D)** The functional groups are presented with the number  
1052 of identified proteins in the different cultivation environments. **(E)** Classification by  
1053 CAZy modules is shown for each cultivation type.

1054

1055 **Fig 3. Exoproteins specifically secreted in xylem sap are dispensable for**  
1056 ***V. dahliae* ex planta phenotype.**

1057 The same number of spores of *V. dahliae* JR2 wildtype (WT) and indicated deletion  
1058 mutant ( $\Delta CP1$ ,  $\Delta CP2$ ,  $\Delta CP1/2$ ,  $\Delta NLP2$ ,  $\Delta NLP3$ ,  $\Delta NLP2/3$ ,  $\Delta MEP1$ ,  $\Delta MEP2$ ,  $\Delta MEP1/2$ ,  
1059  $\Delta GLA1$ ,  $\Delta CBD1$ ,  $\Delta AMY1$ ) and complementation ( $CP1-C$ ,  $CP2-C$ ) strains were point  
1060 inoculated on simulated xylem medium (SXM) plates and incubated at 25°C for 10  
1061 days. For  $\Delta AMY1$ ,  $\Delta GLA1$  and  $\Delta CBD1$  mutants two transformants were spotted. Top-  
1062 view scans of the colonies show a similar phenotype of all strains.

1063

1064 **Fig 4. CAZys and metalloproteases specifically secreted in xylem sap are**  
1065 **dispensable for *V. dahliae* pathogenicity on tomato.**

1066 Ten-day-old tomato seedlings were root-infected with spores of *V. dahliae* JR2 (WT)  
1067 and the indicated single and double deletion strains ( $\Delta GLA1$ ,  $\Delta CBD1$ ,  $\Delta AMY1$ ,  $\Delta MEP1$ ,  
1068  $\Delta MEP2$ ,  $\Delta MEP1/2$ ). Uninfected plants (mock) served as control. The disease index  
1069 was assessed after 21 days of growth in the climate chamber under 16h:8h light:dark  
1070 at 22-25°C and includes the height of the plant, length of the 2<sup>nd</sup> true leaf and weight  
1071 of the plant. Representative plants and discolorations of the hypocotyls are shown for  
1072 each infection. The number (n) of plants is shown for each fungal strain or mock  
1073 treatment. **(A)** Infections with *GLA1* (glycoamylase) deletion strains resulted in the  
1074 same stunting phenotype as WT infections. **(B)** Strains with deletion of *CBD1*  
1075 (carbohydrate-binding domain) or *AMY1* (amylase) resulted in a WT-like induction of  
1076 disease symptoms. **(C)** Absence of metalloproteases Mep1 and Mep2 resulted in WT-  
1077 like *V. dahliae* pathogenicity on tomato.

1078

1079 **Fig 5. *V. dahliae* Cp1 and Cp2 are dispensable for virulence on tomato.**

1080 Ten-day-old tomato seedlings were infected by root-dipping in a spore suspension of  
1081 *V. dahliae* JR2 (WT) and the indicated deletion ( $\Delta CP1$ ,  $\Delta CP2$ ,  $\Delta CP1/2$ ) and  
1082 complementation strains ( $CP1-C$ ,  $CP2-C$ ). Plants were incubated in the climate

1083 chamber under 16h:8h light:dark at 22-25°C. **(A)** The stack diagram shows the  
1084 percentage of plants with the respective disease index. The disease index was  
1085 assessed at 21 days post inoculation and includes the plant height, the longest leaf  
1086 length and the fresh weight, which was compared to uninfected (mock) plants. The  
1087 number (n) of treated plants is given for each fungal strain. **(B)** Representative plants,  
1088 discolorations of the hypocotyls, and the fungal outgrowth of the stems are shown. The  
1089 experiment was repeated twice. *CP1* and *CP2* deletion strains infect tomato plants to  
1090 the same extent as WT and the complementation strains.

1091

### 1092 **Fig 6. Nlp3-GFP is secreted into the extracellular space**

1093 *V. dahliae* JR2 (WT) ectopically overexpressing *GFP* (WT/OE-*GFP*) and WT and *NLP3*  
1094 deletion strains ectopically overexpressing *NLP3-GFP* (WT/OE-*NLP3-GFP* and  
1095  $\Delta$ *NLP3*/OE-*NLP3-GFP*, respectively) were tested for subcellular localization by  
1096 fluorescence microscopy in **A** and localization and production of the intact full-length  
1097 fusion protein intra- and extracellular by western hybridization in **B**. **(A)** Confocal  
1098 microscopy of WT/OE-*NLP3-GFP* and  $\Delta$ *NLP3*/OE-*NLP3-GFP* strains show the  
1099 accumulation of the GFP signal inside the red-stained vacuoles whereas the strain  
1100 WT/OE-*GFP* exhibits GFP signals in the cytoplasm. Spores of the indicated fungal  
1101 strains were inoculated in 300  $\mu$ l liquid PDM in  $\mu$ -slide 8 well microscopy chambers  
1102 (Ibidi) and incubated at 25°C overnight. Fungal hyphae were stained with the  
1103 membrane-selective styryl dye *N*-(3-triethylammoniumpropyl)-4-(*p*-  
1104 diethylaminophenyl-hexatrienyl) pyridinium dibromide (FM4-64). Scale bar = 10  $\mu$ m.  
1105 **(B)** Fungal strains grown in liquid simulated xylem medium (SXM) at 25°C for 24 hours.  
1106 Western hybridization with  $\alpha$ -GFP antibody was performed with 7  $\mu$ g extracellular  
1107 protein extracts from the culture supernatant and 50  $\mu$ g intracellular protein extracts.  
1108 Ponceau S staining served as loading control and WT was used as negative control.

1109 Analysis of extracellular proteins in the supernatant of WT/OE-*NLP3-GFP* and  
1110  $\Delta$ *NLP3*/OE-*NLP3-GFP* strains revealed strong signals for Nlp3-GFP with a size of  
1111 52 kDa whereas intracellular protein extracts result in faint bands at the size of the  
1112 fusion protein as well as for free GFP (~27 kDa). In the control strain WT/OE-*GFP* a  
1113 strong GFP signal was detected in intracellular extracts.

1114

1115 **Fig 7. Necrosis and ethylene inducing-like effectors Nlp2 and Nlp3 contribute to**  
1116 ***V. dahliae* virulence on tomato.**

1117 The *NLP3* deletion strain was tested for *A. thaliana* root colonization and single and  
1118 double deletion strains of *NLP2* and *NLP3* were tested for pathogenicity on tomato.  
1119 Infected plants were incubated in the climate chamber under 16h:8h light:dark at  
1120 22-25°C. **(A)** Three-week-old *A. thaliana* seedlings were root-infected with spores of  
1121 *V. dahliae* JR2 and *NLP3* deletion strain overexpressing free GFP (WT/OE-*GFP* and  
1122  $\Delta$ *NLP3*/OE-*GFP*, respectively). At three and five days post inoculation (dpi) the  
1123 colonization of the fungal hyphae was monitored with root cells stained by 0.05%  
1124 propidium iodide/0.01% silwet solution. The experiment was repeated twice with two  
1125 individual transformants of  $\Delta$ *NLP3*/OE-*GFP*. Fluorescence microscopy pictures show  
1126 similar initial colonization of *V. dahliae* WT/OE-*GFP* and  $\Delta$ *NLP3*/OE-*GFP* on the root  
1127 surface at 3 dpi and whole root colonization at 5 dpi. 3D Surface views were generated  
1128 by Slidebook 5.0 software from stacks of single pictures. Scale bar = 10  $\mu$ m. **(B, C)**  
1129 Ten-day-old tomato seedlings were root-infected with spores of *V. dahliae* JR2 and the  
1130 indicated single *NLP2* ( $\Delta$ *NLP2*) and *NLP3* ( $\Delta$ *NLP3*) and *NLP2/3* double deletion strains  
1131 ( $\Delta$ *NLP2/3*). Uninfected plants (mock) served as control. Representative plants,  
1132 discolorations of the hypocotyls, and the fungal outgrowth of the surface sterilized  
1133 stems are shown. The disease index was assessed at 21 dpi, which shows that plants  
1134 infected with *NLP2* and *NLP3* single and double deletion strains exhibit an intermediate

1135 phenotype when compared with mock and WT-infected plants. The number of treated  
1136 plants (n) is shown for each fungal strain. The experiment was repeated twice. For the  
1137 deletion strains two individual transformants were tested.



1138 **Supporting information**

1139 **S1 Fig. Verification of *V. dahliae* *NLP2* and *NLP3* deletion or overexpression**  
1140 **constructs.**

1141 *V. dahliae* JR2 (WT) was transformed with the respective deletion cassettes to  
1142 generate *NLP2* and *NLP3* deletion strains ( $\Delta NLP2$  and  $\Delta NLP3$ , respectively) via  
1143 homologous recombination. The *NLP2/NLP3* double deletion strain ( $\Delta NLP2/3$ ) was  
1144 obtained by transforming the  $\Delta NLP3$  strain with the  $\Delta NLP2$  construct. Strains  
1145 overexpressing ectopically integrated *GFP* or *NLP3-GFP* were constructed by  
1146 transforming WT or *NLP3* deletion strains with the displayed constructs (*GFP* and  
1147 *NLP3-GFP* are driven by the *gpdA* promoter and followed by the *trpC* terminator). All  
1148 constructs contain resistance cassettes (*HYG<sup>R</sup>*: hygromycin resistance; *NAT<sup>R</sup>*:  
1149 nourseothricin resistance) with a *gpdA* promoter and a *trpC* terminator. Schemes with  
1150 used restriction enzymes, corresponding cutting sites (arrows) and probes (red lines)  
1151 used for Southern hybridization are presented in **A** and **B**. **(A)** *XhoI* and the 5' flanking  
1152 region as probe were used for verification of the *NLP2* deletion strain. **(B)**  $\Delta NLP3$  strain  
1153 was confirmed using *XhoI* with 5' flanking region as probe. And ectopic integration of  
1154 *GFP* into  $\Delta NLP3$  strain and *NLP3-GFP* into WT or  $\Delta NLP3$  strain was verified with  
1155 restriction enzyme *BglI* with *GFP* as probe. **(C)** Confirmation of deletion strains by  
1156 Southern hybridization is shown for  $\Delta NLP2$  #4 = VGB390, #8 = VGB391;  $\Delta NLP3$  #4 =  
1157 VGB384, #5 = VGB385,  $\Delta NLP2/3$  #6 = VGB400, #7 = VGB401;  $\Delta NLP3/OE-GFP$  #8 =  
1158 VGB431, #9 = VGB432, WT/OE-*NLP3-GFP* #2 = VGB407, #6 = VGB408,  $\Delta NLP3/OE-$   
1159 *NLP3-GFP* #1 = VGB409, #7 = VGB410. Genomic WT DNA served as control.  
1160 Restriction enzymes, probes and sizes of expected fragments are indicated.

1161

1162 **S2 Fig. Verification of *V. dahliae* *CP1* and *CP2* deletion and complementation**  
1163 **strains.**

1164 Deletion strains ( $\Delta CP1$  and  $\Delta CP2$ ) were obtained via homologous recombination  
1165 between the deletion constructs and *V. dahliae* JR2 (WT). The *CP2* deletion strain was  
1166 transformed with the *CP1* deletion construct to generate the double deletion strain  
1167  $\Delta CP1/2$ . To generate ectopic complementation strains the constructs were integrated  
1168 into the deletion strain as indicated by //. The constructs contain resistance cassettes  
1169 ( $HYG^R$ : hygromycin resistance;  $NAT^R$ : nourseothricin resistance) controlled by the  
1170 *gpdA* promoter and the *trpC* terminator. Schemes with used restriction enzymes,  
1171 corresponding cutting sites (arrows) and probes (red lines) used for Southern  
1172 hybridization are presented in **A** and **B**. **(A)** Confirmation of *CP1* deletion and  
1173 complementation strain was achieved by enzyme restriction of gDNA with *Sall* and  
1174 3' flanking region as probe or *MfeI* and 5' flanking region as probe. **(B)** *SmaI* with  
1175 3' flanking region or *HindIII* with 5' flanking region as probe was used for *CP2* deletion  
1176 and complementation strains. **(C)** Deletion and complementation strains were verified  
1177 by Southern hybridization:  $\Delta CP1$  #11 = VGB316, #13 = VGB317; *CP1-C* #6 = VGB489,  
1178 #7 = VGB490;  $\Delta CP2$  #4 = VGB406, #14 = VGB422; *CP2-C* #3 = VGB429, #7 =  
1179 VGB430;  $\Delta CP1\Delta CP2$  #5 = VGB423, #10 = VGB424. Genomic WT DNA was used as  
1180 control. Restriction enzymes, probes and sizes of expected fragments are depicted.

1181

### 1182 **S3 Fig. Verification of *V. dahliae* *MEP1* and *MEP2* deletion strains.**

1183 *MEP1* and *MEP2* deletion strains ( $\Delta MEP1$  and  $\Delta MEP2$ , respectively) were constructed  
1184 via homologous recombination between the deletion construct and *V. dahliae* JR2  
1185 (WT) and confirmed by Southern hybridization. Restriction sites of used enzymes  
1186 (arrows) and probes (red lines) used for Southern hybridization are depicted in **A** and  
1187 **B**. **(A)** Deletion of *MEP1* was confirmed after enzyme restriction of gDNA with *KpnI* or  
1188 *BglII* and 3' flanking region as probe. *MEP1* deletion construct contains hygromycin  
1189 resistance cassette ( $HYG^R$ ) controlled by the *gpdA* promoter and the *trpC* terminator.

1190 **(B)** Verification of *MEP2* deletion strain containing the nourseothricin resistance  
1191 (*NAT<sup>R</sup>*) cassette under control of the *gpdA* promoter and the *trpC* terminator was  
1192 achieved with *SacI* or *NcoI* restriction and 3' flanking region as probe. **(C)** Deletion  
1193 strains were confirmed by Southern hybridization:  $\Delta$ *MEP1* #7 = VGB226, #8 =  
1194 VGB227;  $\Delta$ *MEP2* #2 = VGB133, #8 = VGB126;  $\Delta$ *MEP1/2* #2 = VGB204, #5 = VGB203.  
1195 Genomic WT DNA served as control. Restriction enzymes, probes and sizes of  
1196 expected fragments are indicated.

1197

#### 1198 **S4 Fig. Verification of *V. dahliae* *GLA1*, *CBD1* and *AMY1* deletion strains.**

1199 By homologous recombination between the deletion construct and *V. dahliae* JR2  
1200 (WT) the depicted deletion strains were obtained. The deletion constructs contain a  
1201 nourseothricin resistance cassette (*NAT<sup>R</sup>*) controlled by the *gpdA* promoter and the  
1202 *trpC* terminator. The used probes (red lines) and restriction enzymes with their cutting  
1203 sites (arrows) are illustrated in the schemes (left). The expected fragments were  
1204 confirmed by Southern hybridization for each deletion strain with WT as control (right).  
1205 **(A)** With *XhoI* and 5' flanking region as probe *GLA1* deletion strains ( $\Delta$ *GLA1*) #4 =  
1206 VGB129 and #10 = VGB131 were verified. **(B)** Verification of *CBD1* deletion strains  
1207 ( $\Delta$ *CBD1* #2 = VGB127, #5 = VGB132) was achieved with *PvuI* enzyme restriction and  
1208 3' flanking region as probe and **(C)** *AMY1* deletion strains ( $\Delta$ *AMY1* #2 = VGB130, #10  
1209 = VGB128) were verified with *KpnI* and 3' flanking region as probe.

1210

#### 1211 **S5 Fig. Expression of *NLP3-GFP* under control of a constitutively active 1212 promoter allows *V. dahliae* wildtype-like growth on solid media.**

1213 50 000 spores of *V. dahliae* JR2 wildtype (WT) and *NLP3* deletion strains ( $\Delta$ *NLP3*) and  
1214 corresponding strains ectopically overexpressing *NLP3-GFP* (WT/OE-*NLP3-GFP* and  
1215  $\Delta$ *NLP3*/OE-*NLP3-GFP*, respectively) were point inoculated on minimal medium (CDM)

1216 plates. The growth phenotype was observed after 10 days of incubation at 25°C and  
1217 revealed a similar phenotype for all tested strains.

1218

1219 **S1 Table. List of identified proteins in SXM and xylem sap.**

1220 **S2 Table. Annotation of identified proteins in SXM and xylem sap.**

1221 **S3 Table. Functional groups of secreted proteins.**

1222 **S4 Table. CAZy classification of secreted proteins.**

1223 **S5 Table. *Verticillium* strains used in this study.**

1224 **S6 Table. Primers used in this study.**

1225 **S7 Table. Plasmids used in this study.**

1226 **S1 Text. Additional Materials and Methods.**

**A**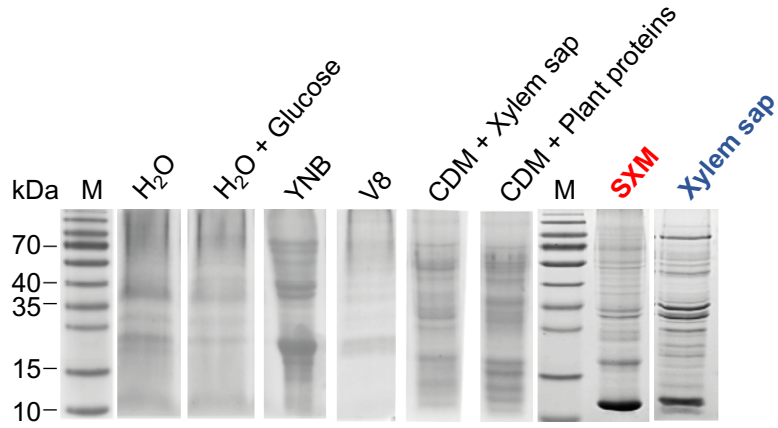**B**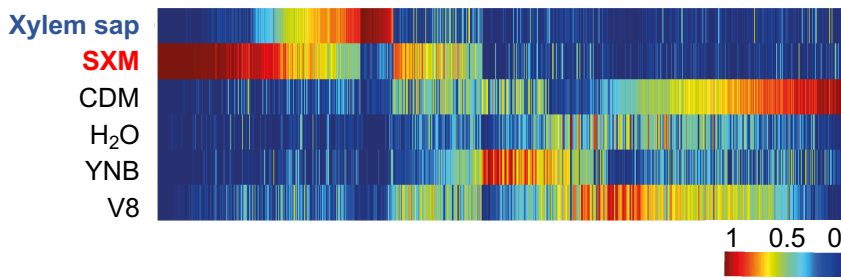**C**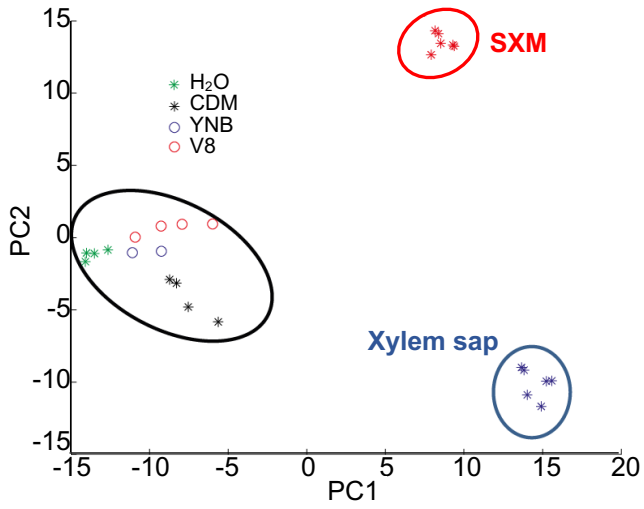**Figure 1**

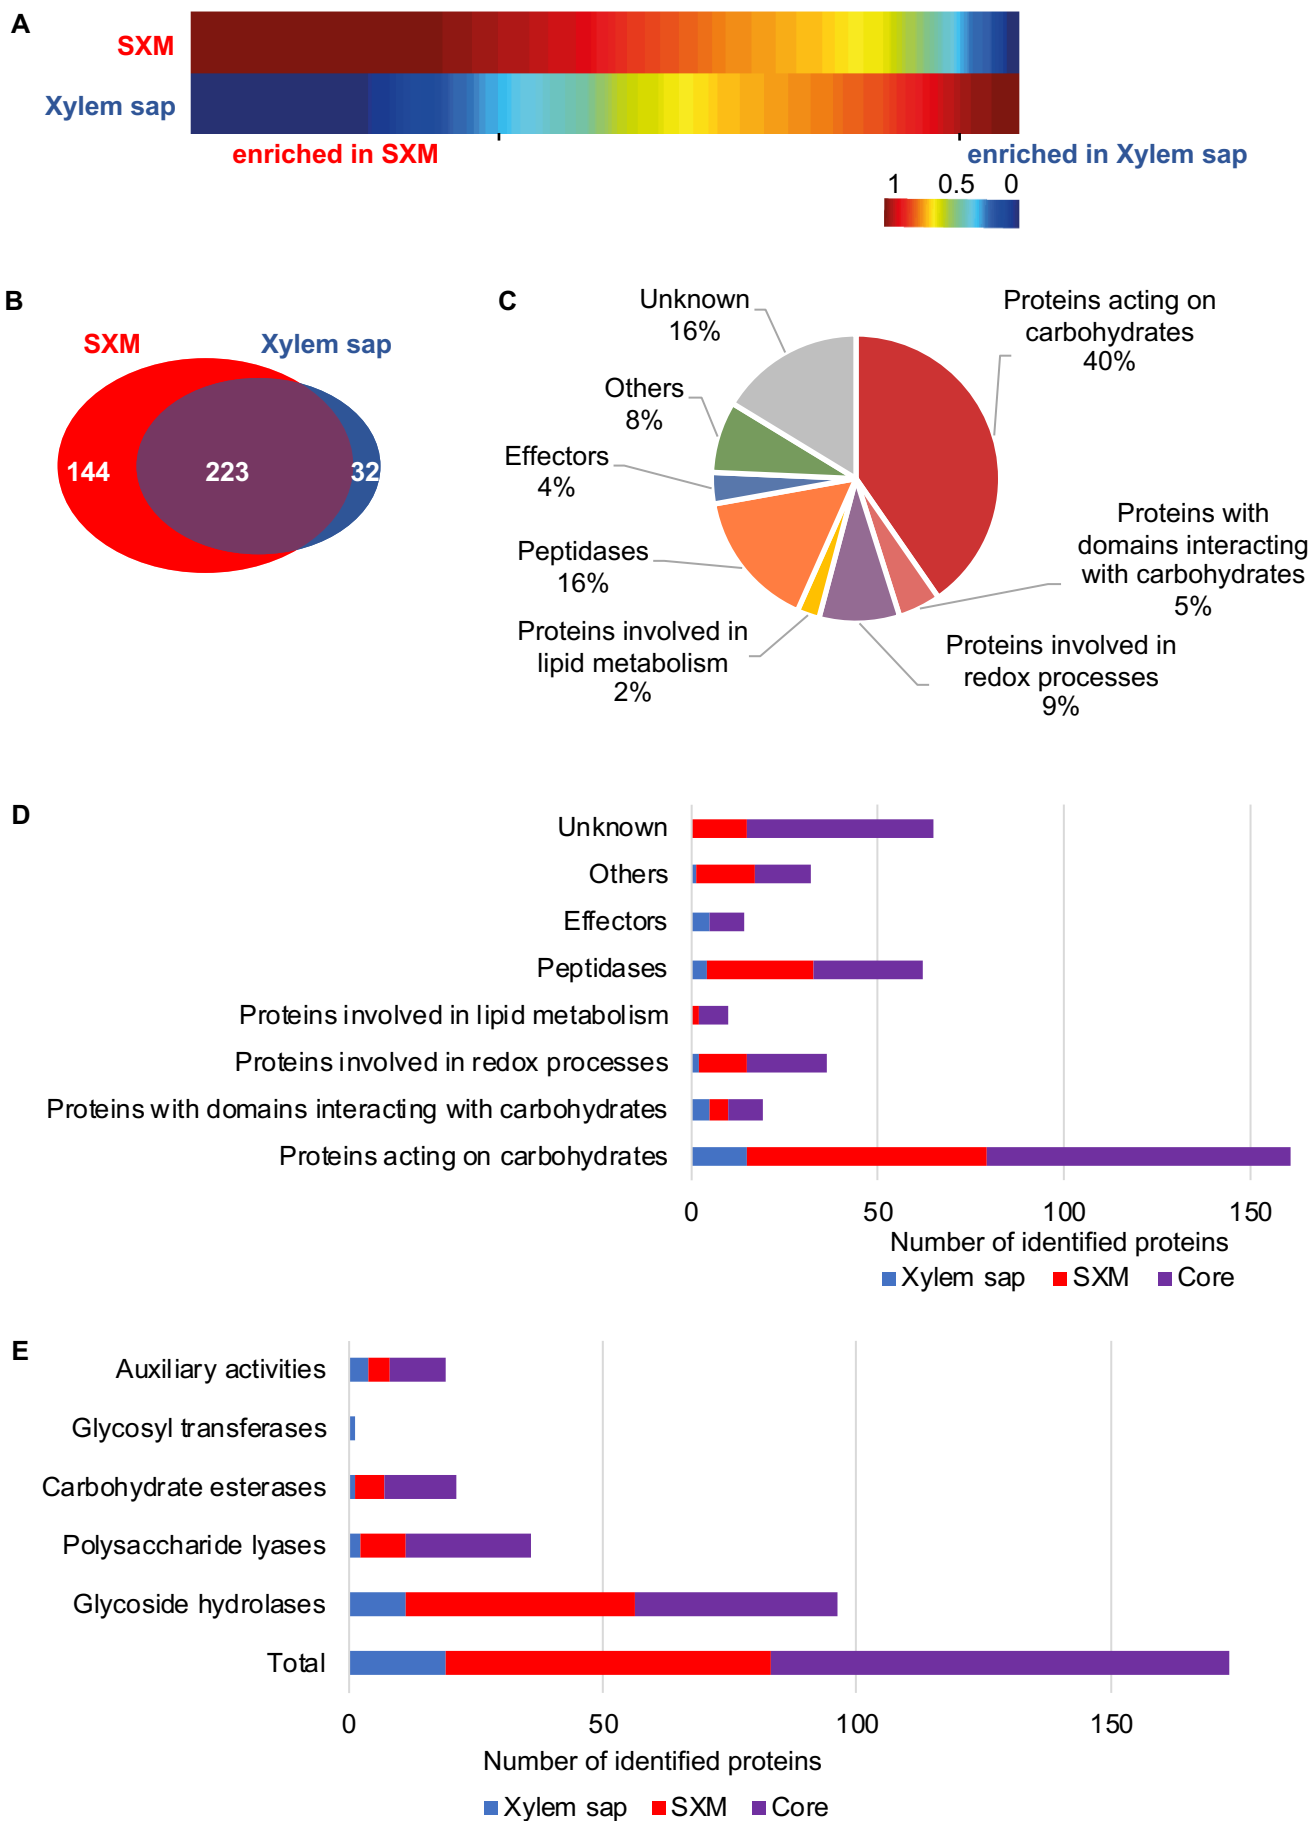

**Figure 2**

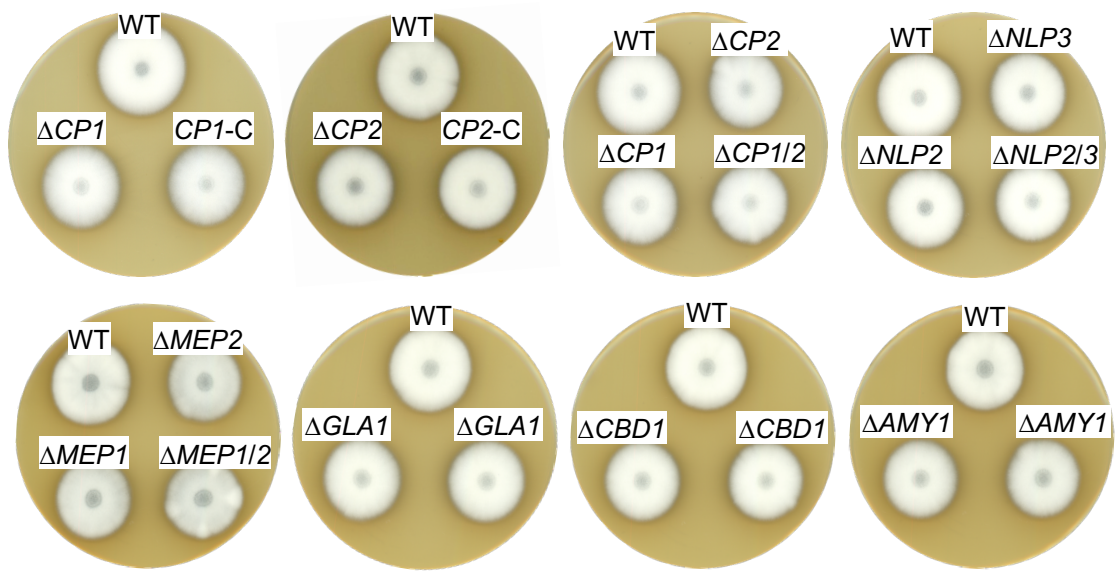

Figure 3

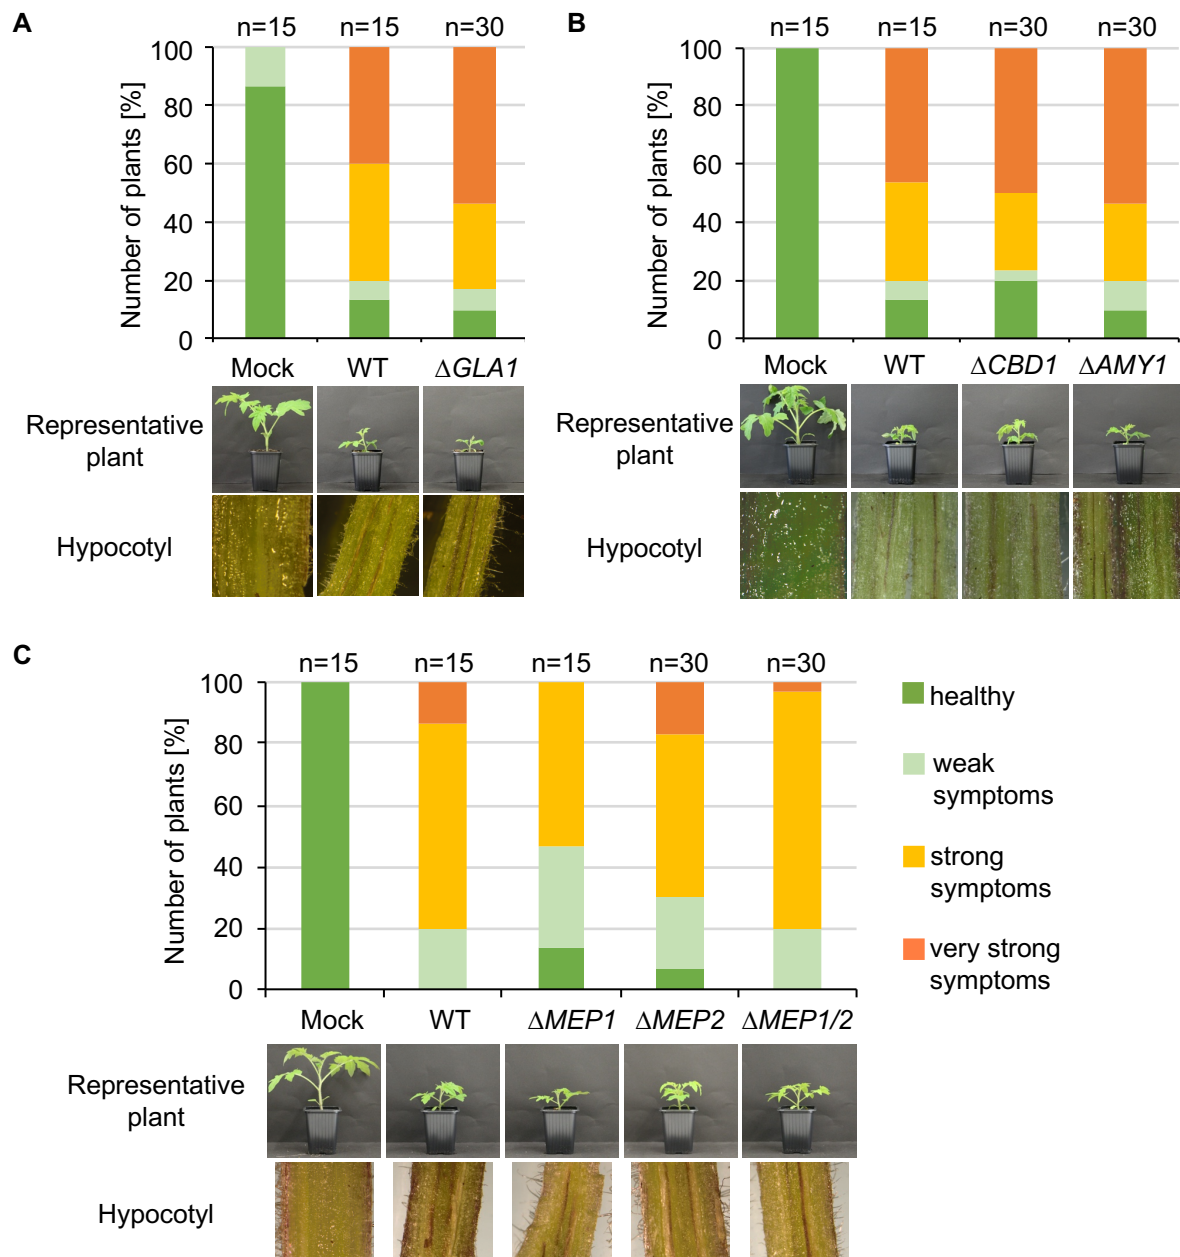

Figure 4



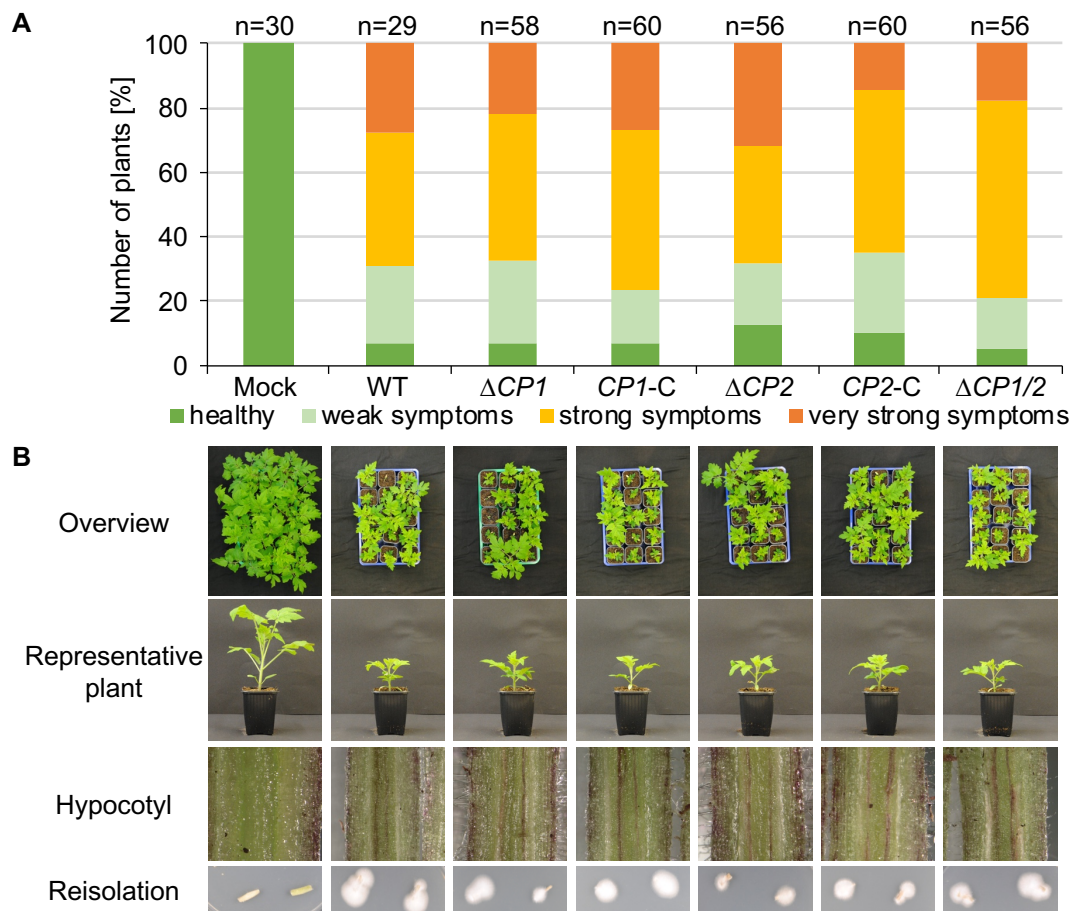

**Figure 5**

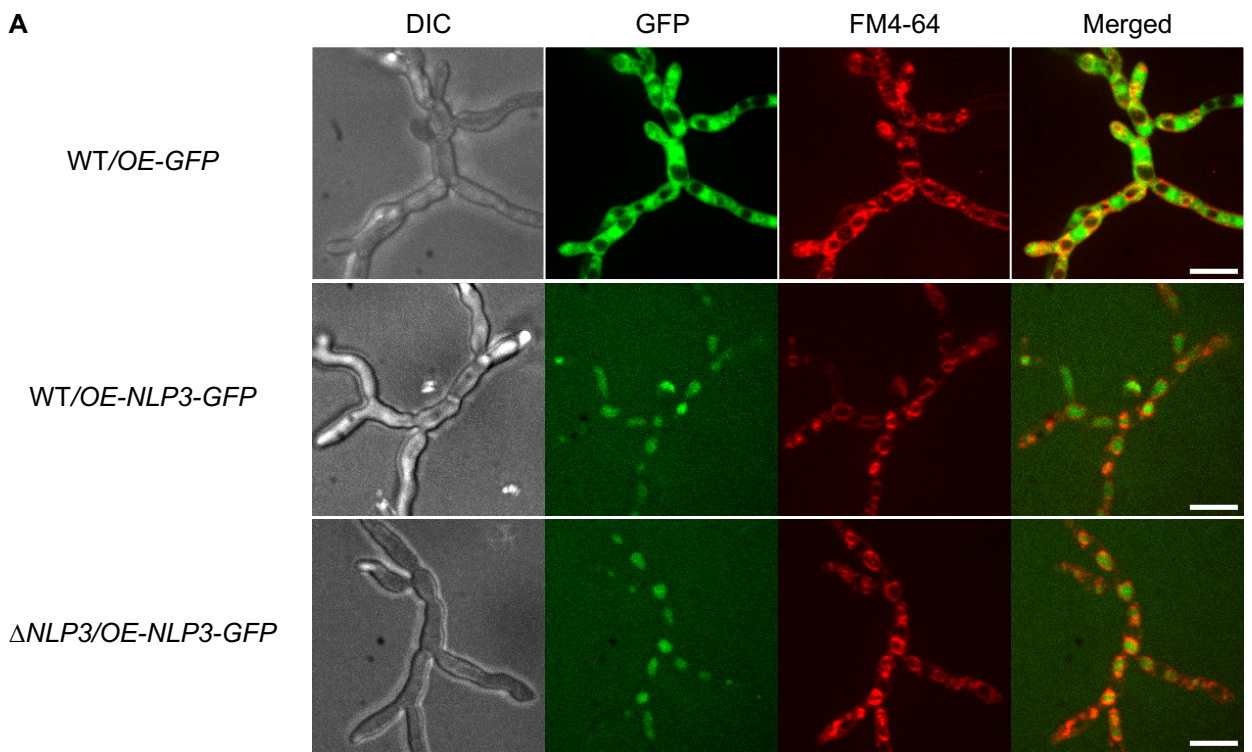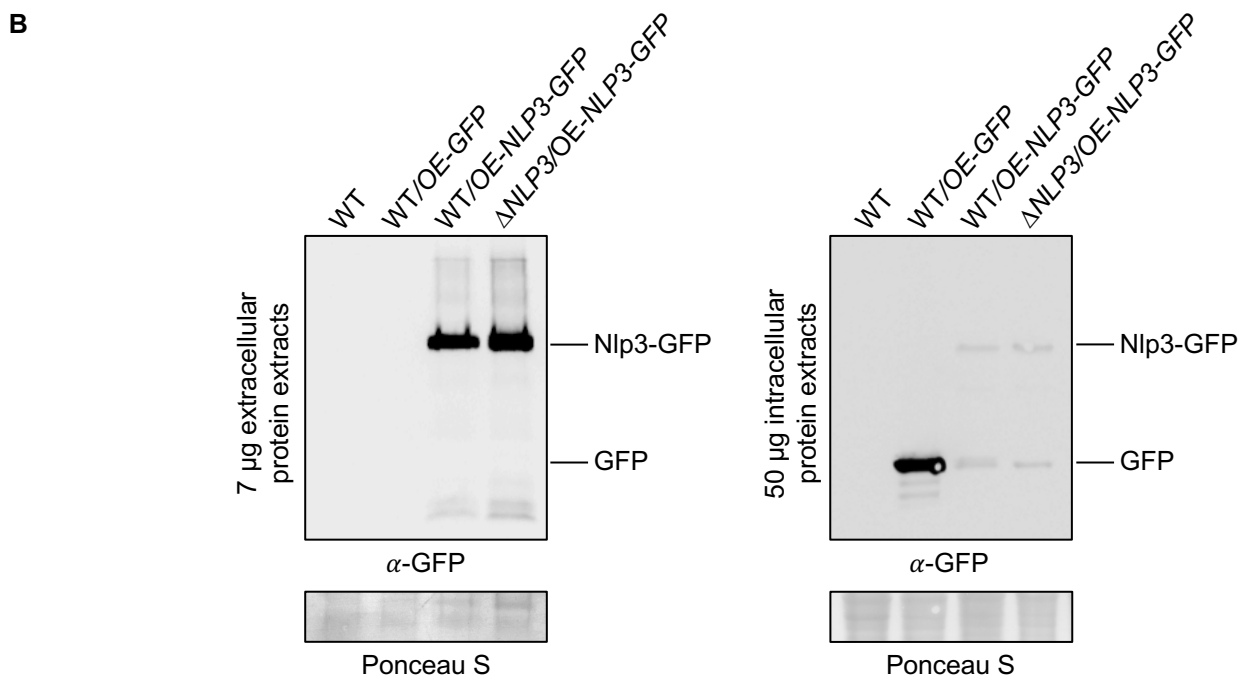

Figure 6

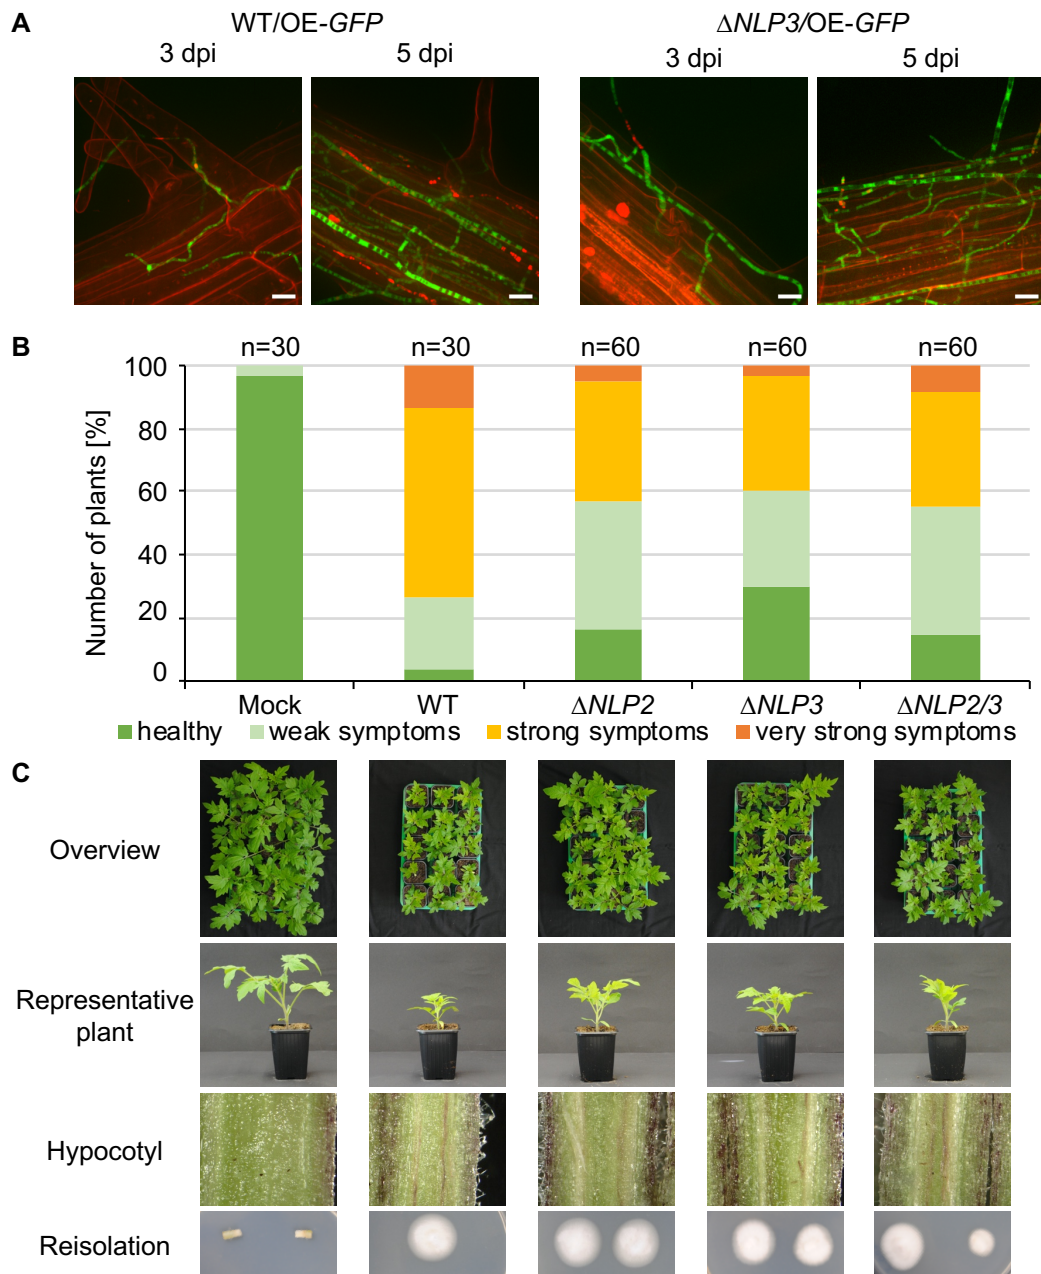

Figure 7
